# Supplementary material for: A Two-Sample Mendelian Randomization Analysis Investigates Associations Between Gut Microbiota and Dyslipidemia
Source: Preprints.org preprint supplement (doi:10.20944/preprints202309.1073.v1), 2023-09-18

rs73218807

rs682403

rs2820282

rs12597105

rs6958419

All

0.000

0.025

0.050

0.075

MR leave-one-out sensitivity analysis for  
' || id:ebi-a-GCST90017058' on 'apolipoprotein A-I || id:ieu-b-107'

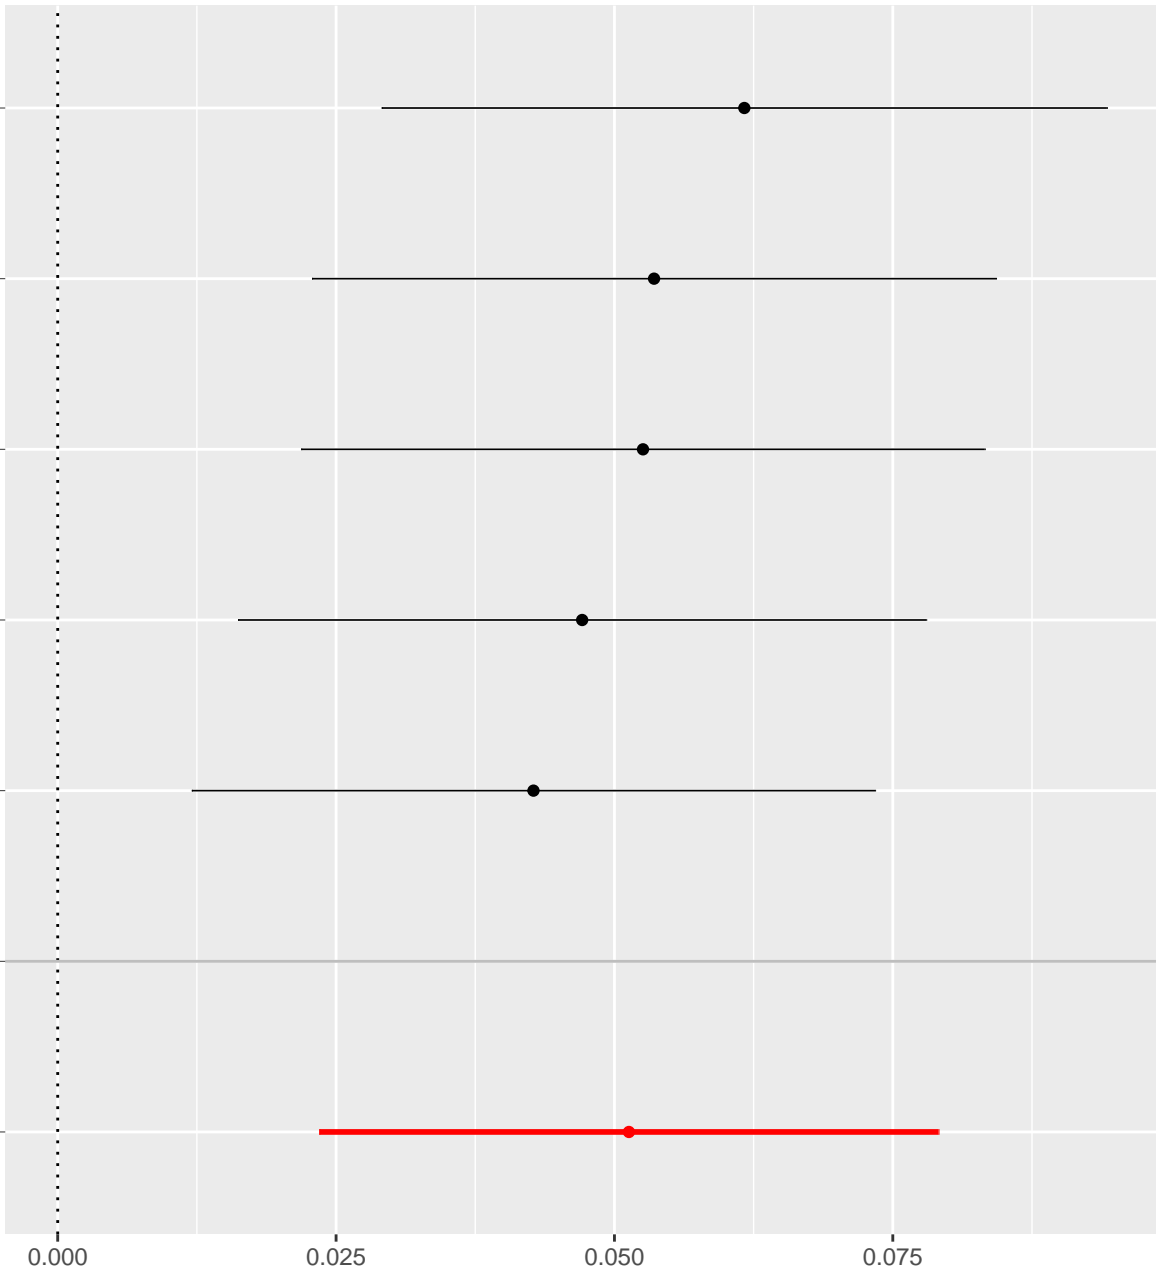

Supplement: Supplementary file 14 [file supplementary]
