# Supplementary material for: A Two-Sample Mendelian Randomization Analysis Investigates Associations Between Gut Microbiota and Dyslipidemia
Source: Preprints.org preprint supplement (doi:10.20944/preprints202309.1073.v1), 2023-09-18

rs58405430

rs2872237

rs2569953

rs1883097

rs7184125

All

0.00

0.02

0.04

0.06

MR leave-one-out sensitivity analysis for  
' || id:ebi-a-GCST90017073' on 'apolipoprotein B || id:ieu-b-108'

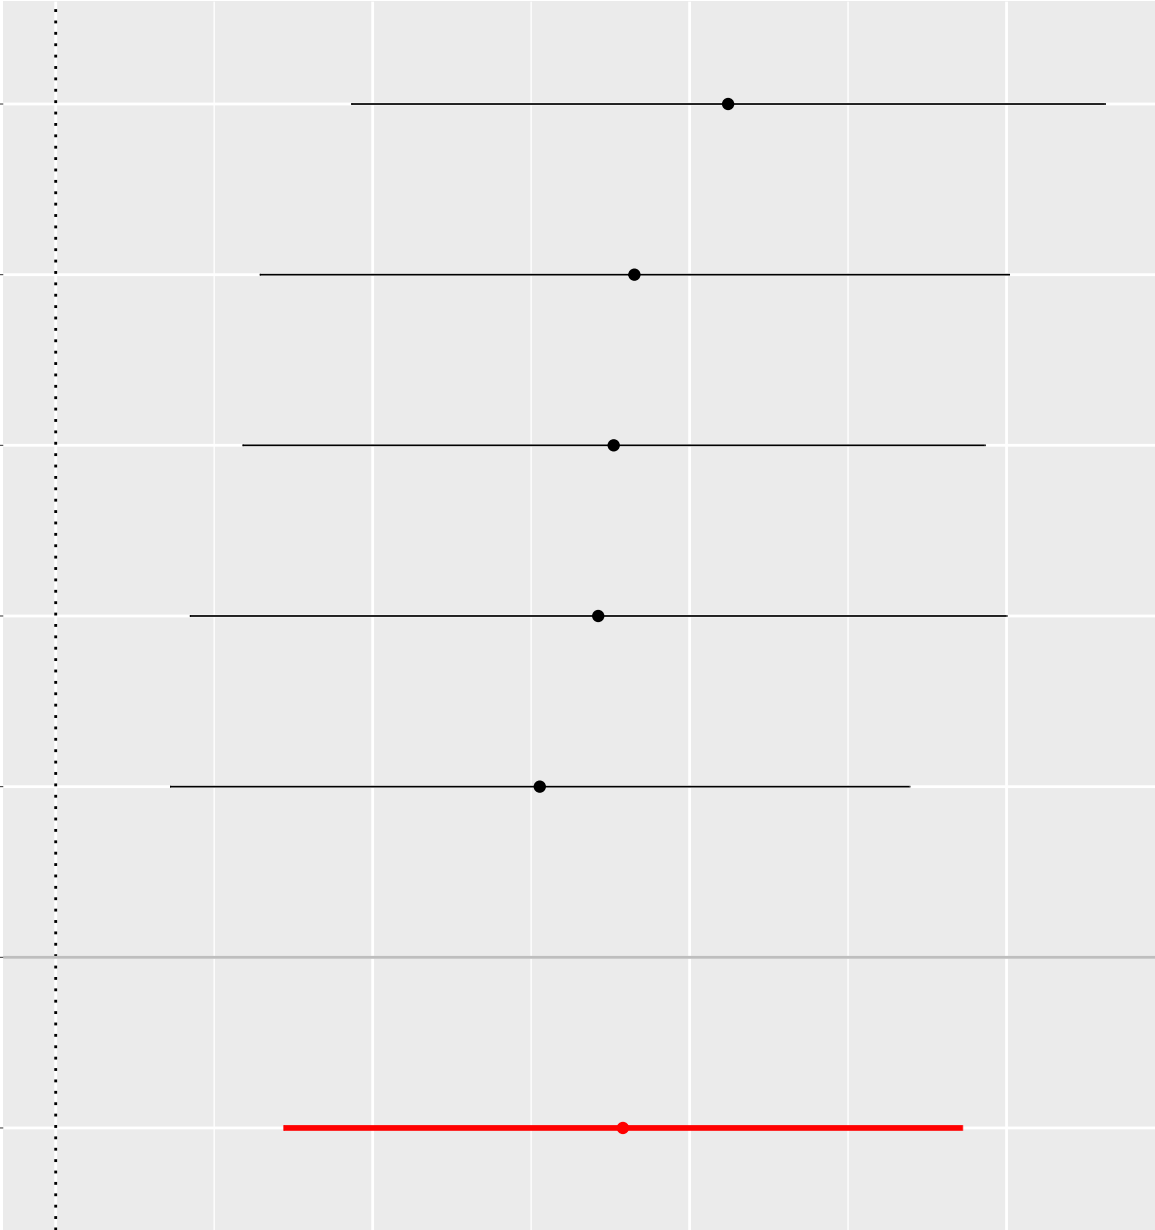

Supplement: Supplementary file 17 [file supplementary]
