# Supplementary material for: A Two-Sample Mendelian Randomization Analysis Investigates Associations Between Gut Microbiota and Dyslipidemia
Source: Preprints.org preprint supplement (doi:10.20944/preprints202309.1073.v1), 2023-09-18

rs1334944

rs4802933

rs76029318

rs894996

rs6776814

rs10202904

All

-0.03

-0.02

-0.01

0.00

MR leave-one-out sensitivity analysis for  
' || id:ebi-a-GCST90017033' on 'apolipoprotein B || id:ieu-b-108'

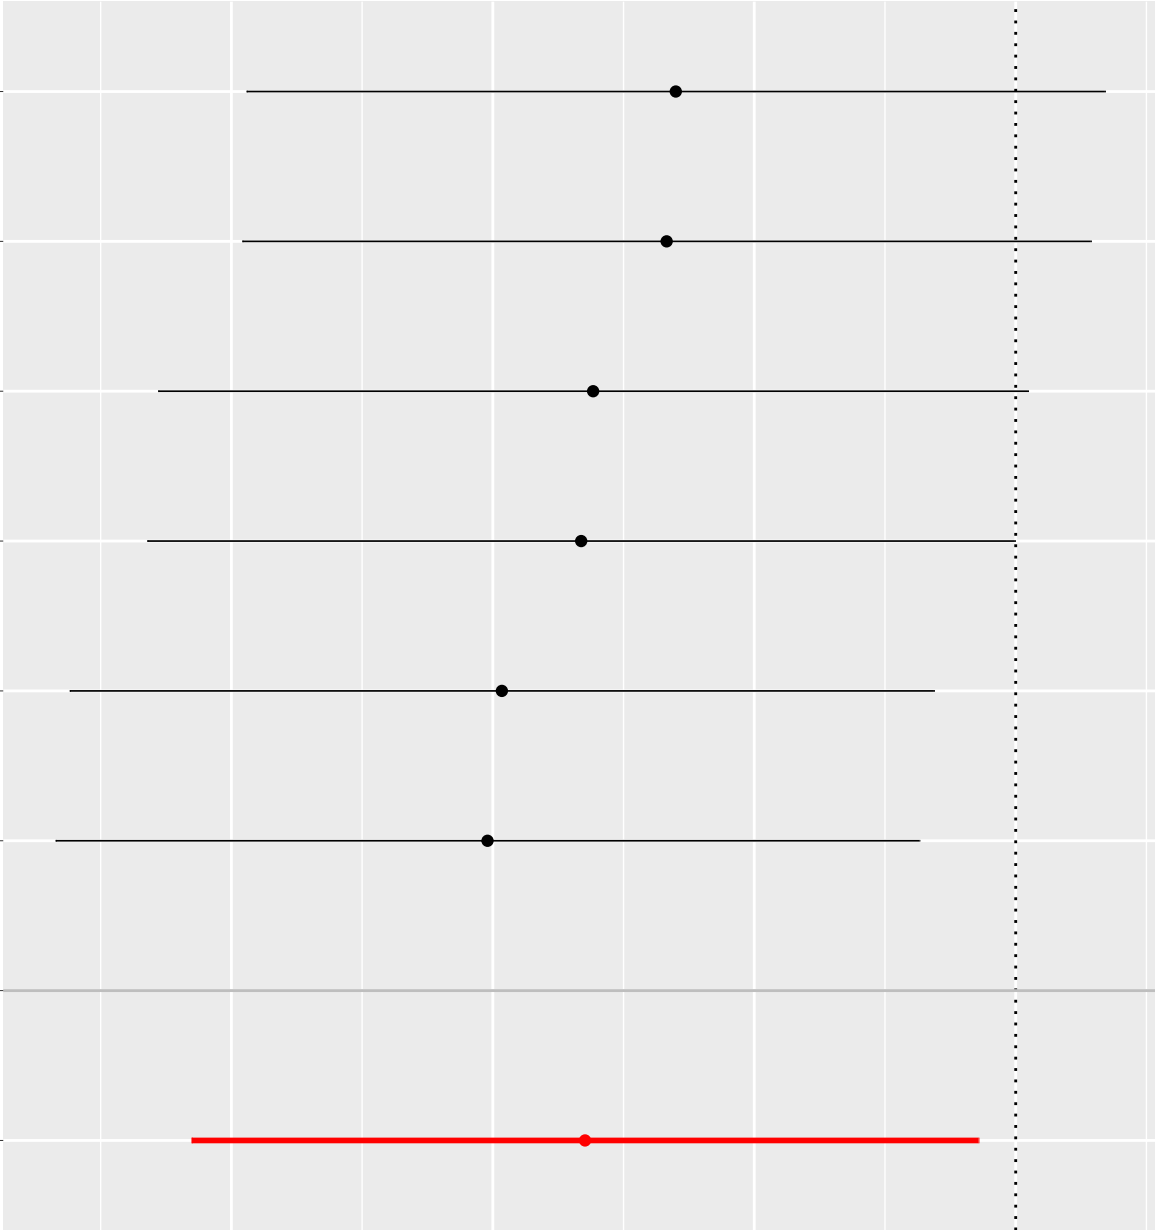

Supplement: Supplementary file 28 [file supplementary]
