# Supplementary figures and images for: A Two-Sample Mendelian Randomization Analysis Investigates Associations Between Gut Microbiota and Dyslipidemia
Source: Preprints.org preprint supplement (doi:10.20944/preprints202309.1073.v1), 2023-09-18

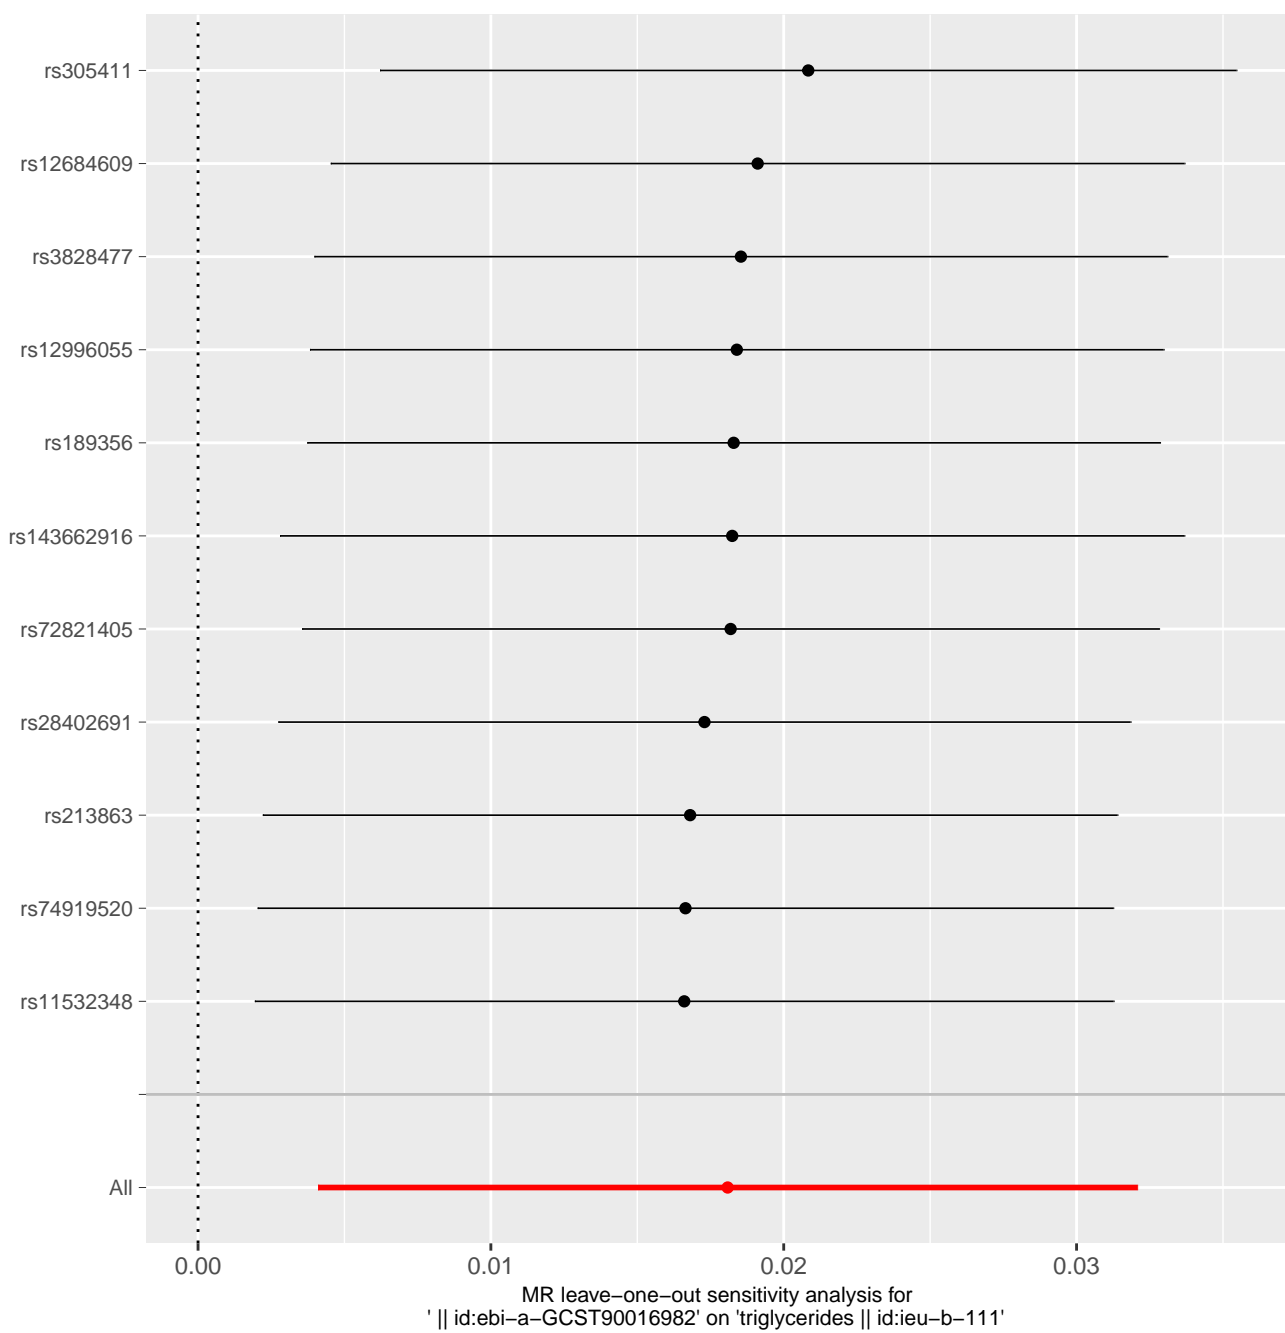

Supplement: Supplementary file 1 [file supplementary]

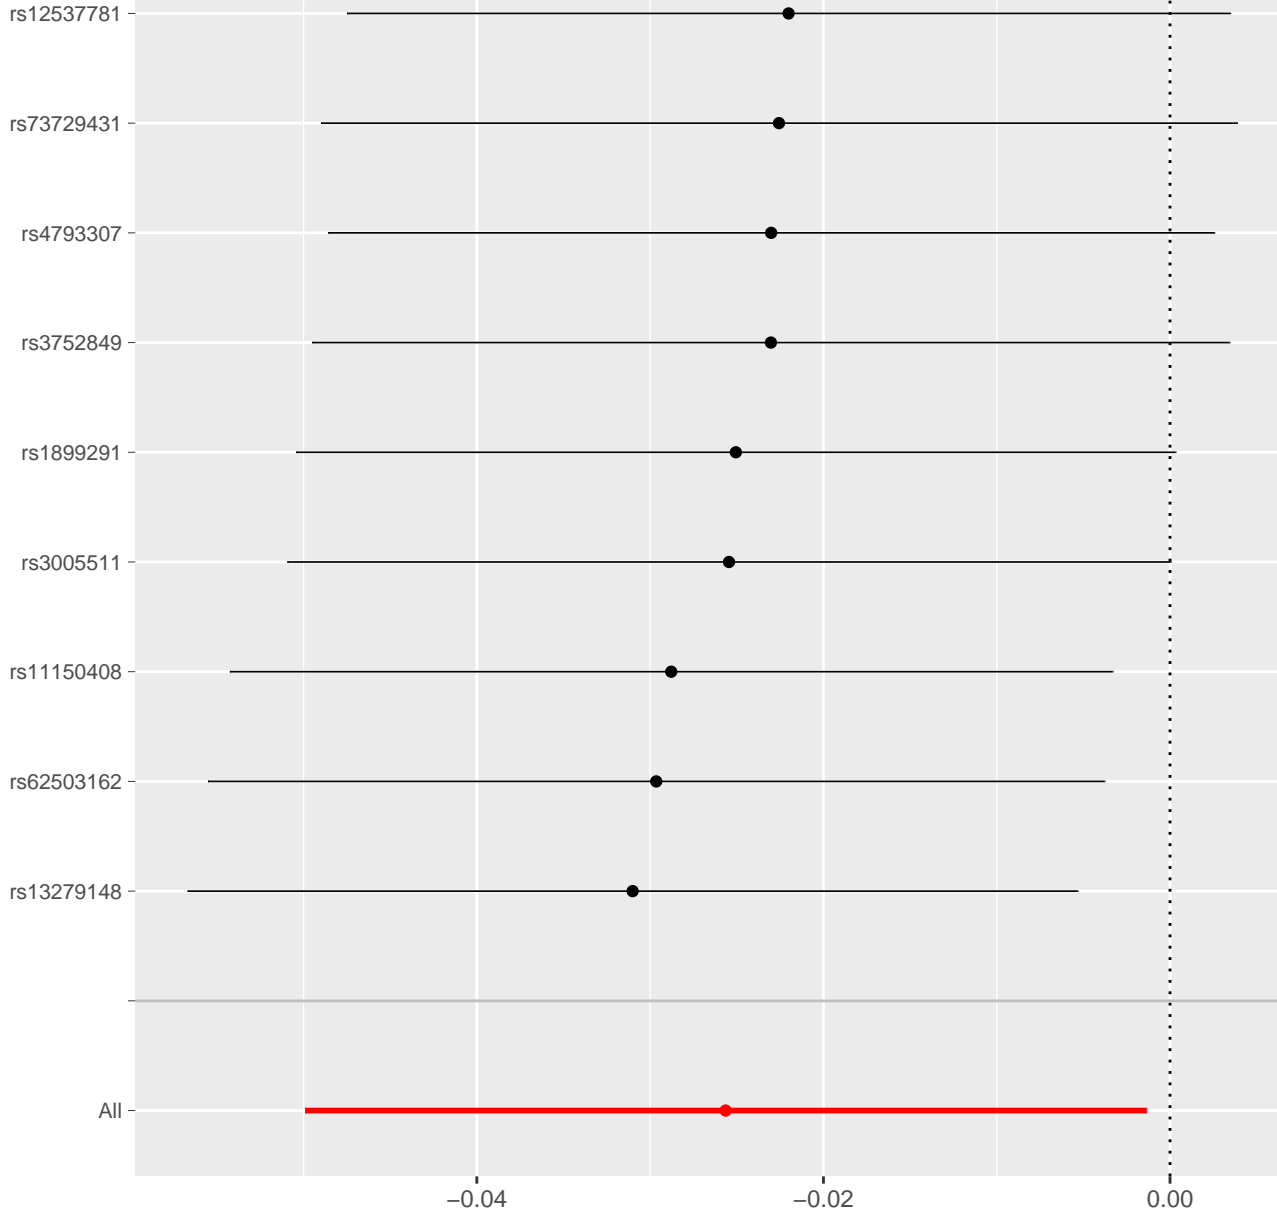

Supplement: Supplementary file 2 [file supplementary]

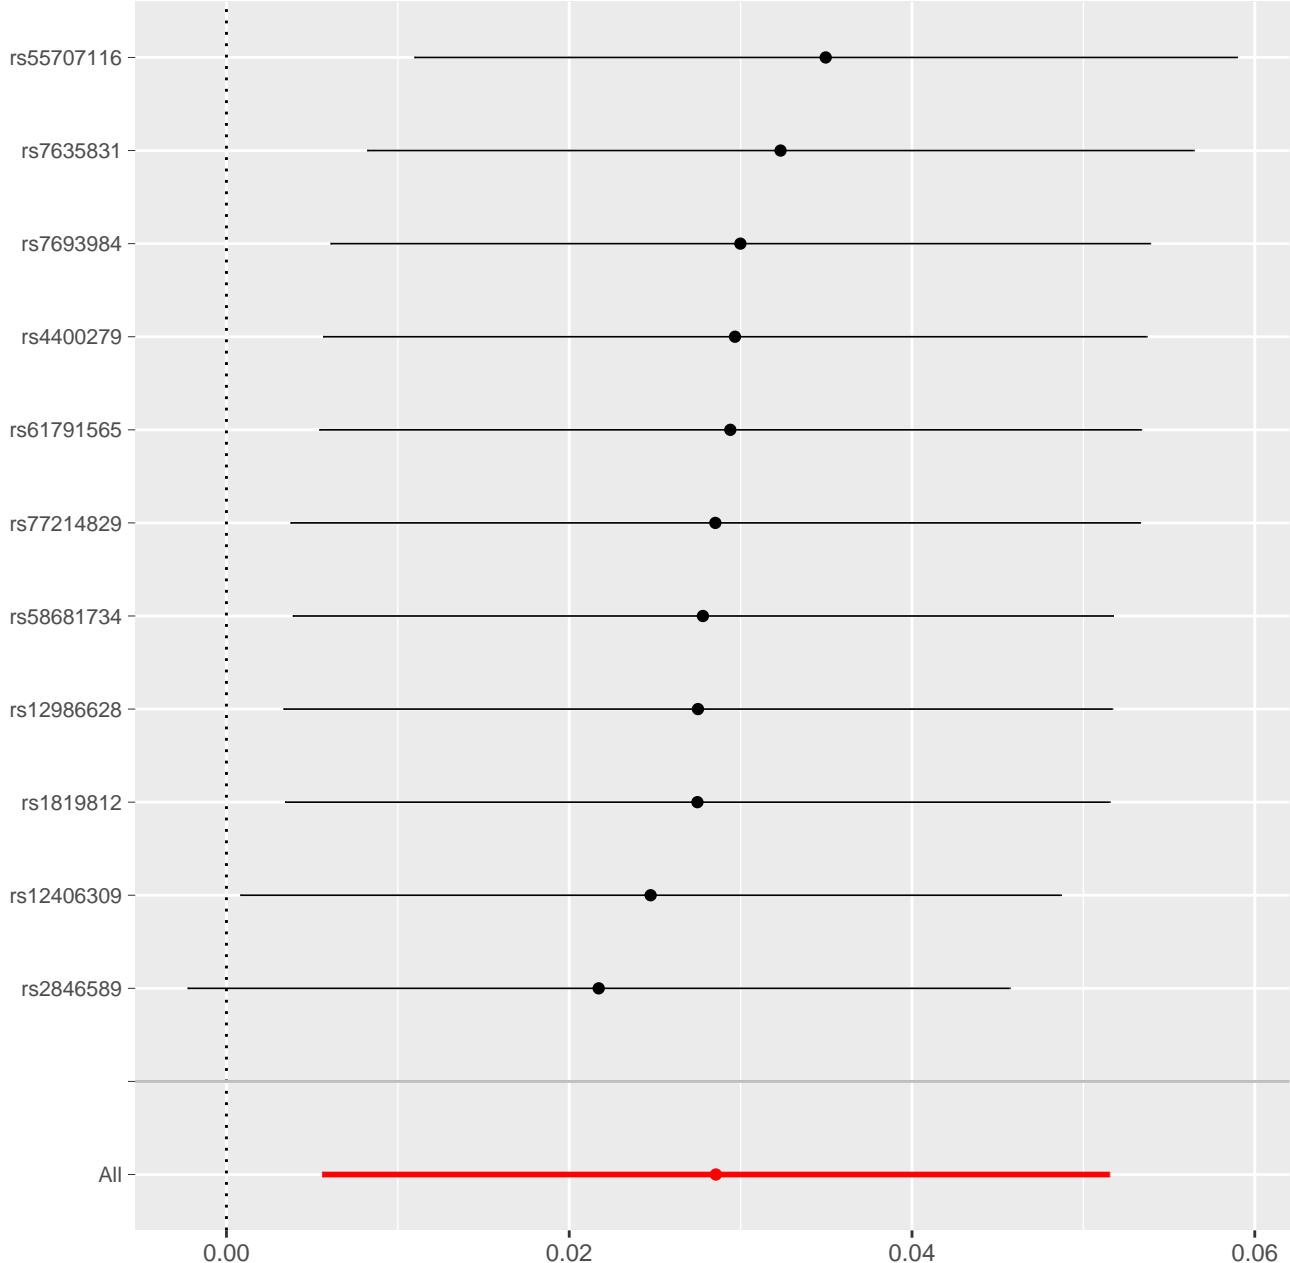

Supplement: Supplementary file 3 [file supplementary]

rs58405430

rs1883097

rs2872237

rs7184125

All

0.000

0.025

0.050

0.075

MR leave-one-out sensitivity analysis for  
' || id:ebi-a-GCST90017073' on 'LDL cholesterol || id:ieu-b-110'

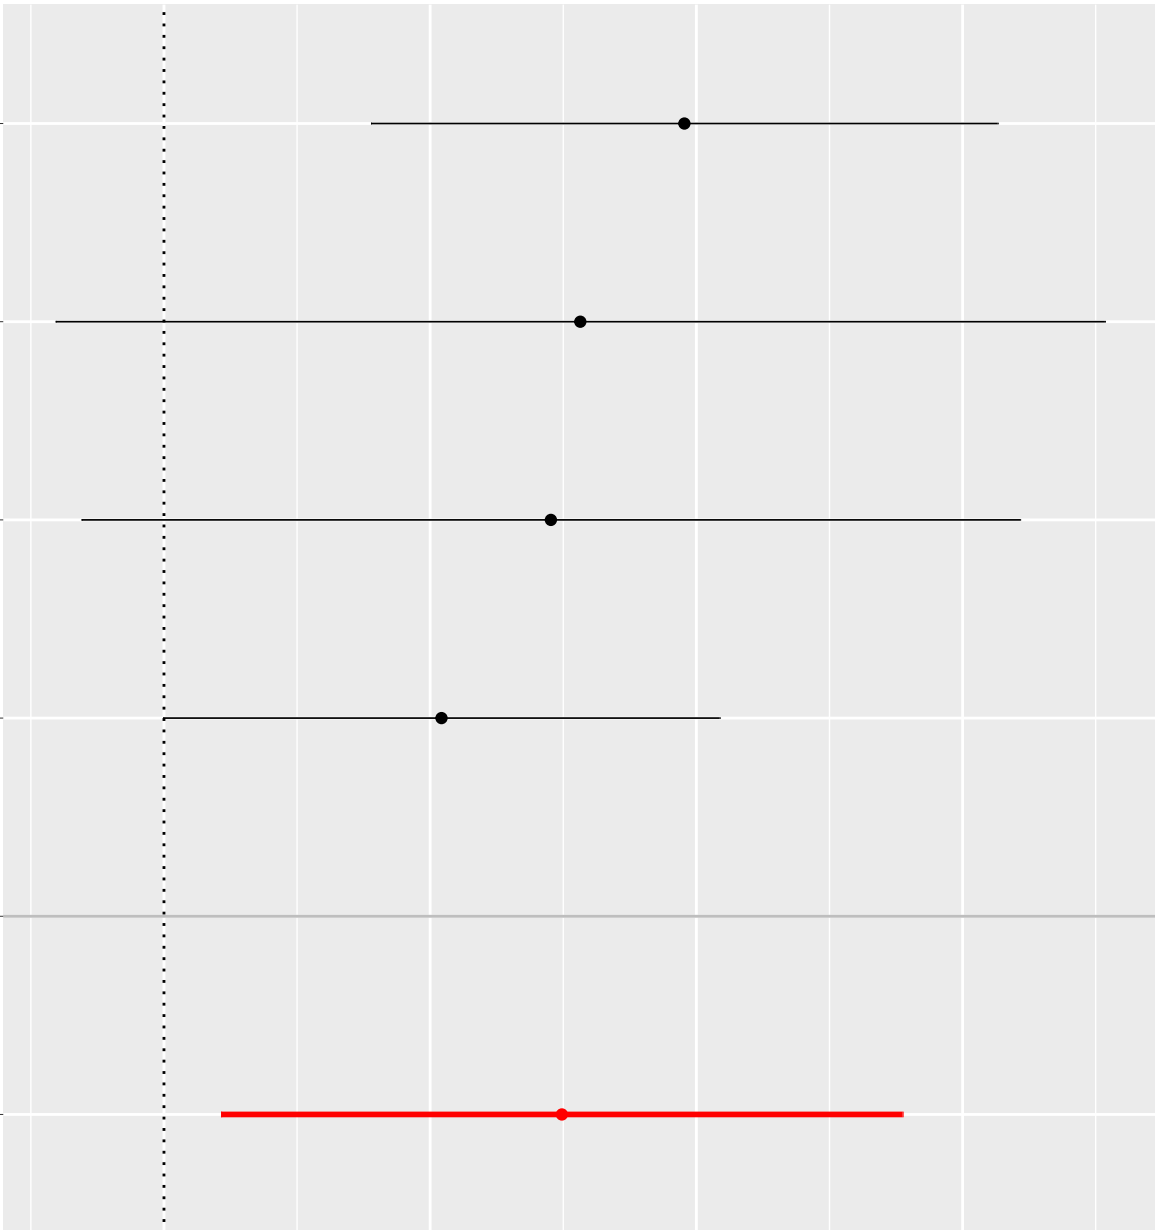

Supplement: Supplementary file 4 [file supplementary]

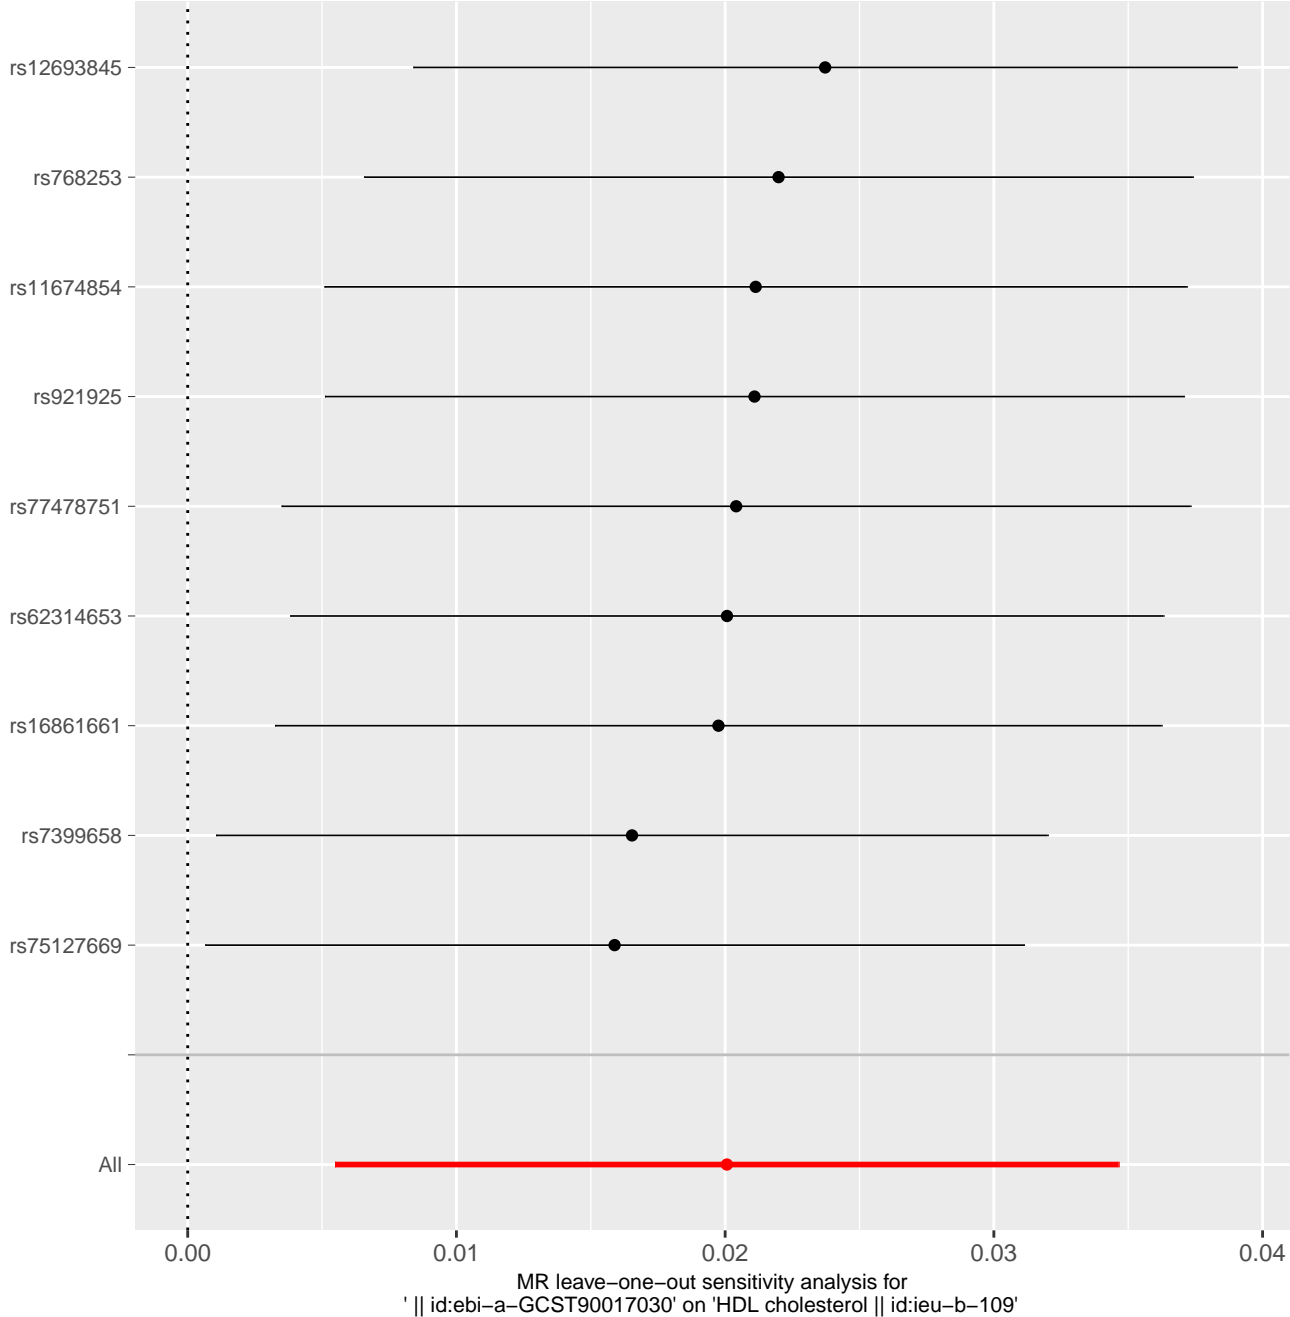

Supplement: Supplementary file 5 [file supplementary]

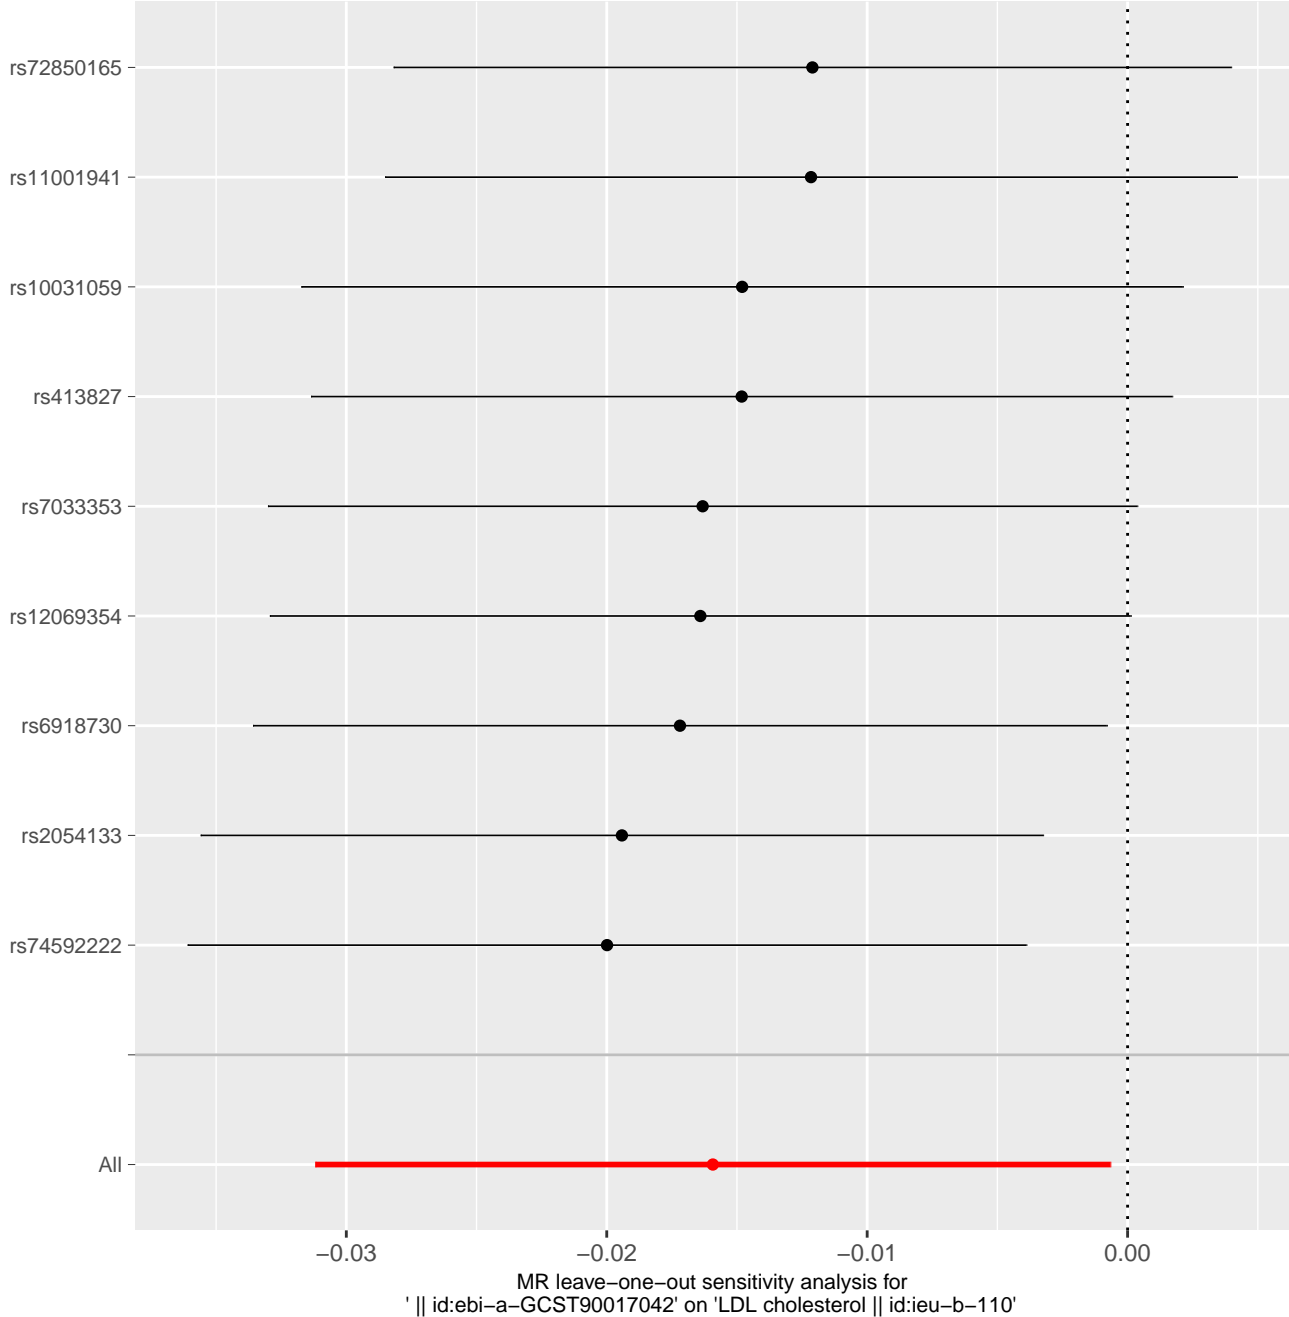

Supplement: Supplementary file 6 [file supplementary]

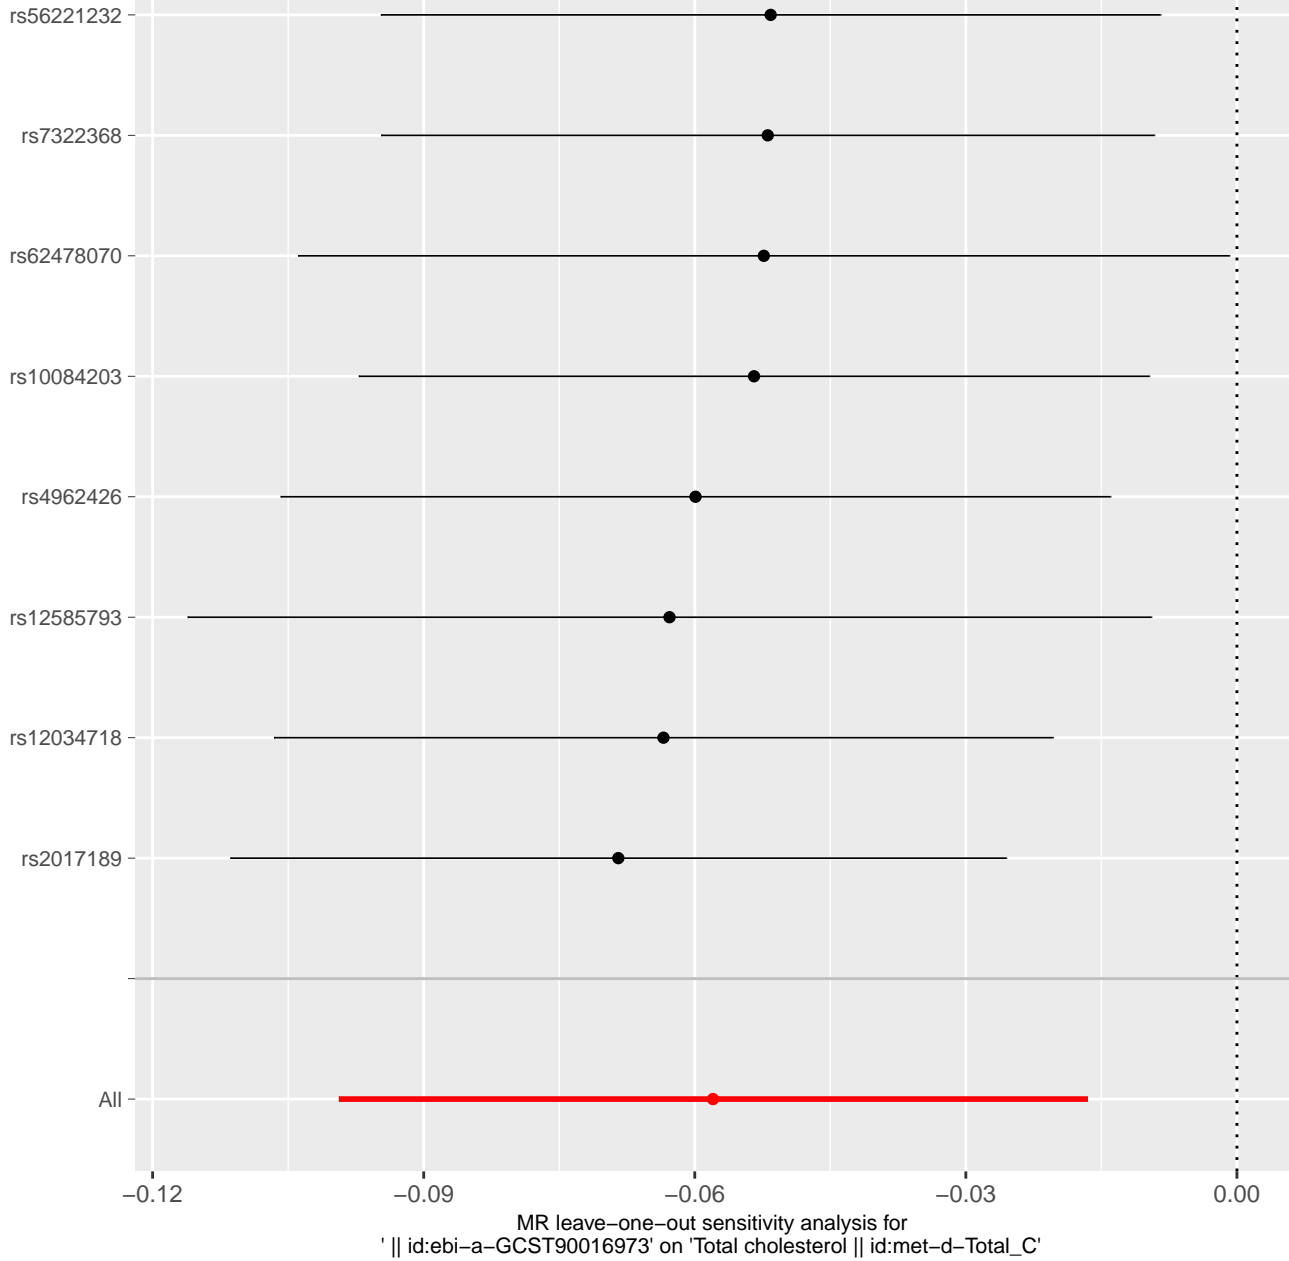

Supplement: Supplementary file 7 [file supplementary]

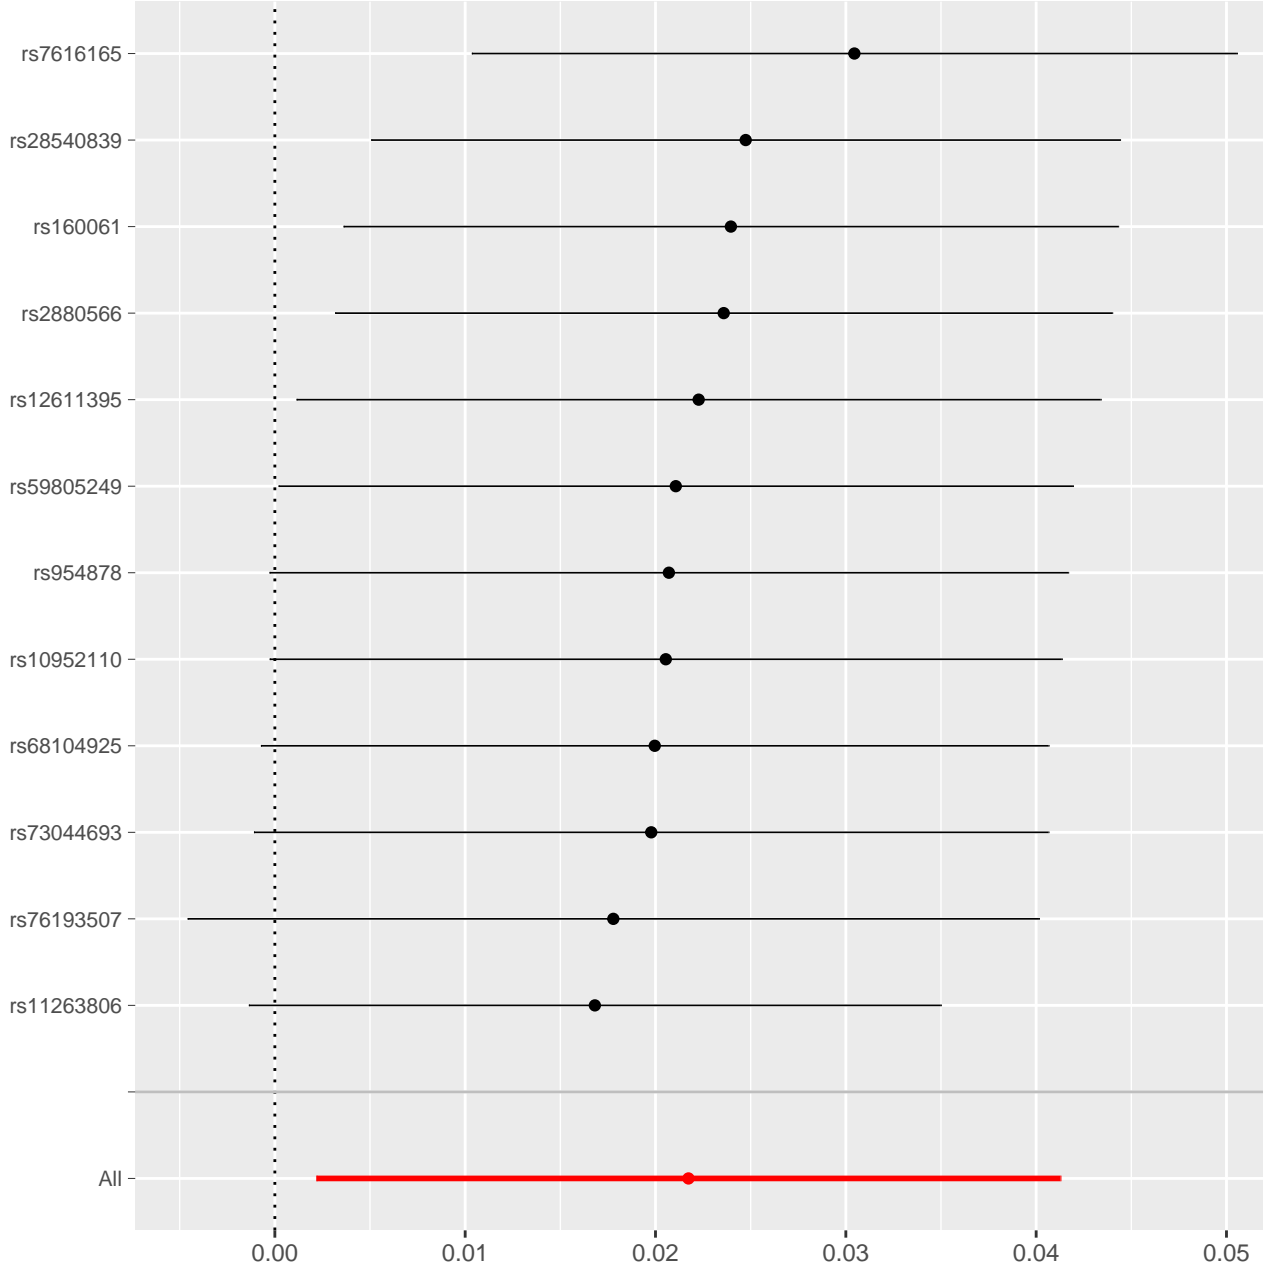

MR leave-one-out sensitivity analysis for  
' || id:ebi-a-GCST90017024' on 'HDL cholesterol || id:ieu-b-109'

Supplement: Supplementary file 8 [file supplementary]

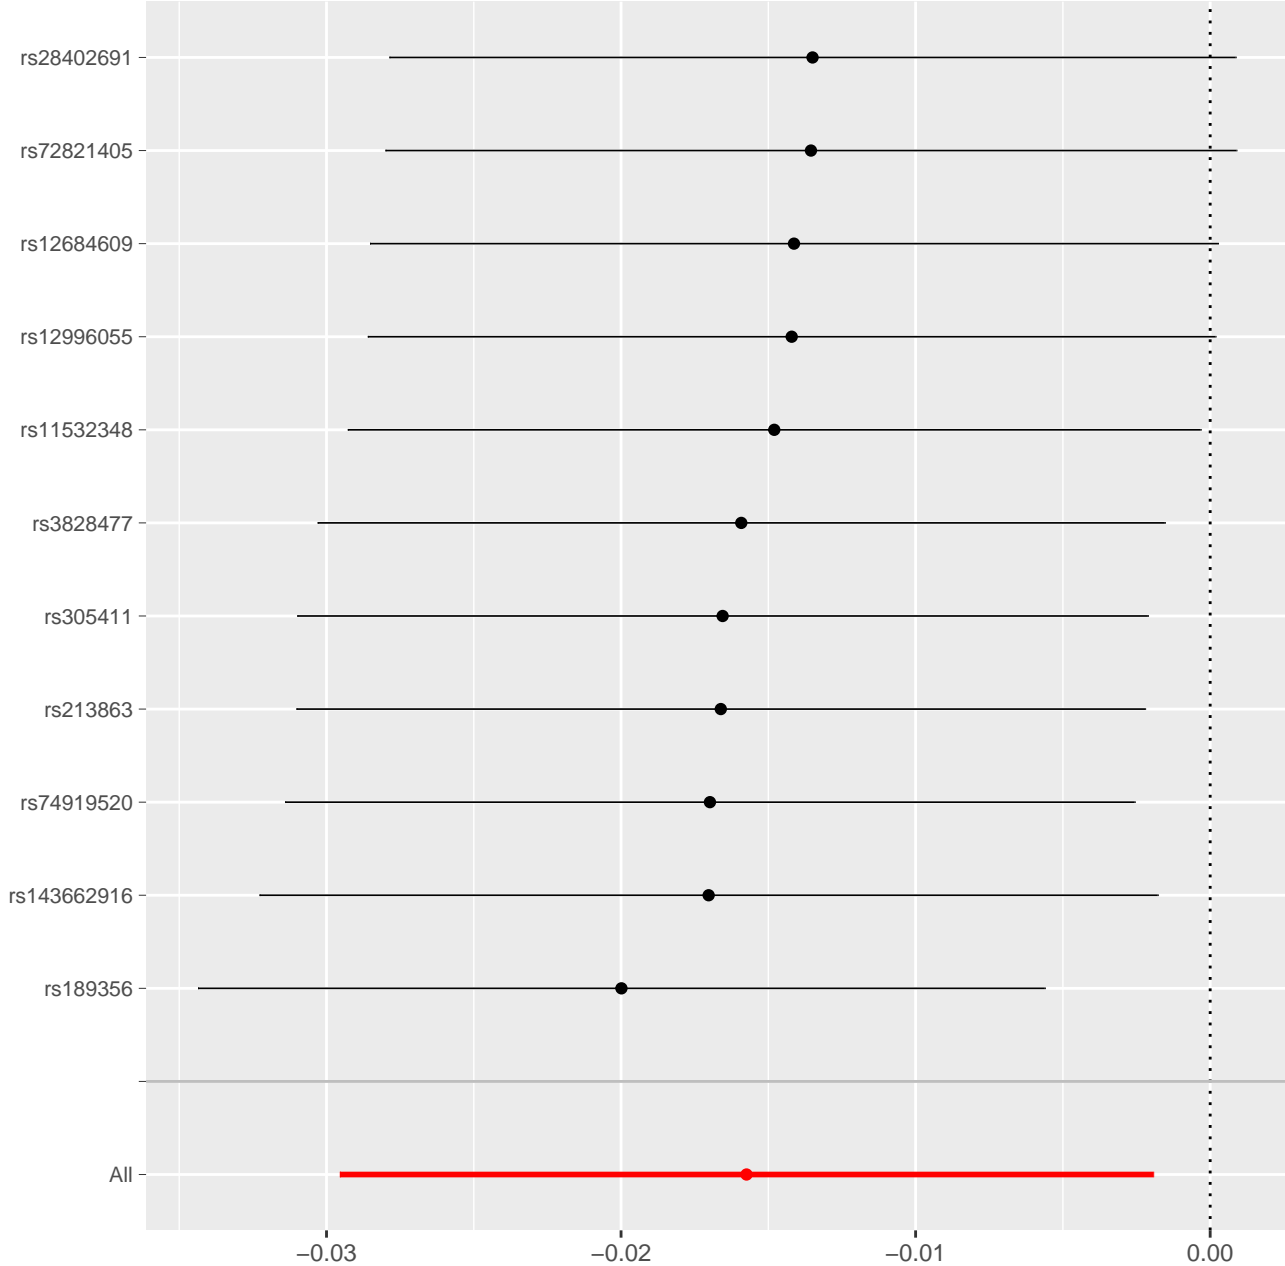

Supplement: Supplementary file 9 [file supplementary]

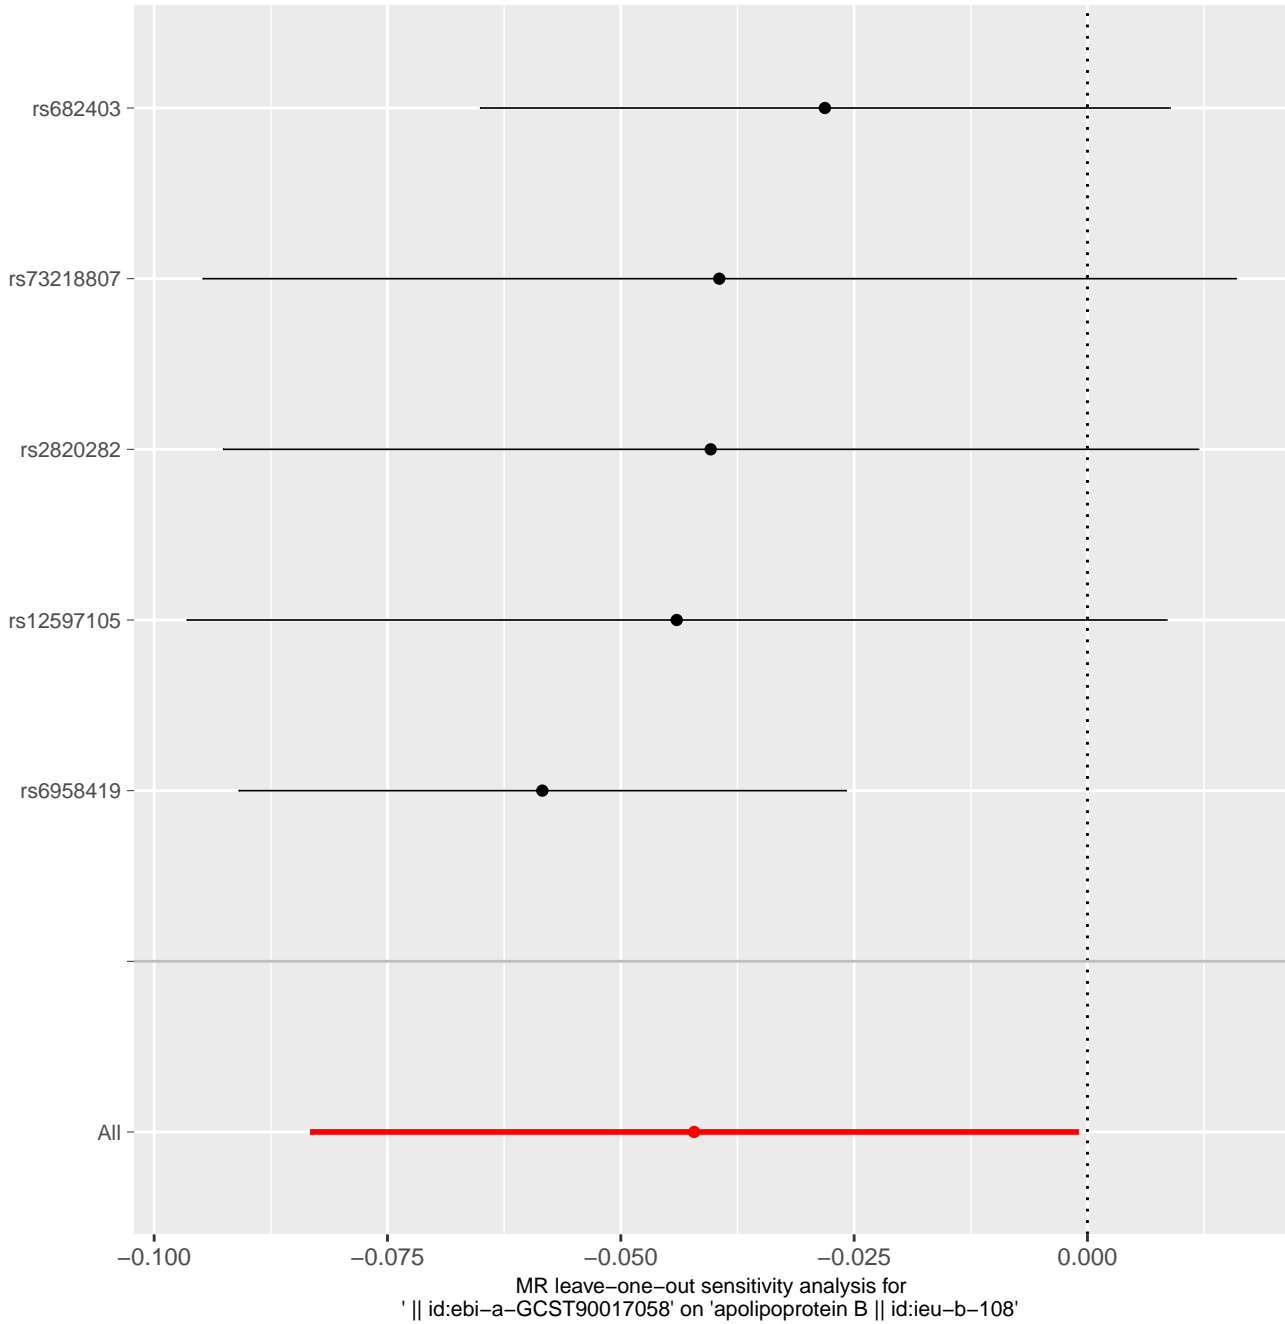

Supplement: Supplementary file 10 [file supplementary]

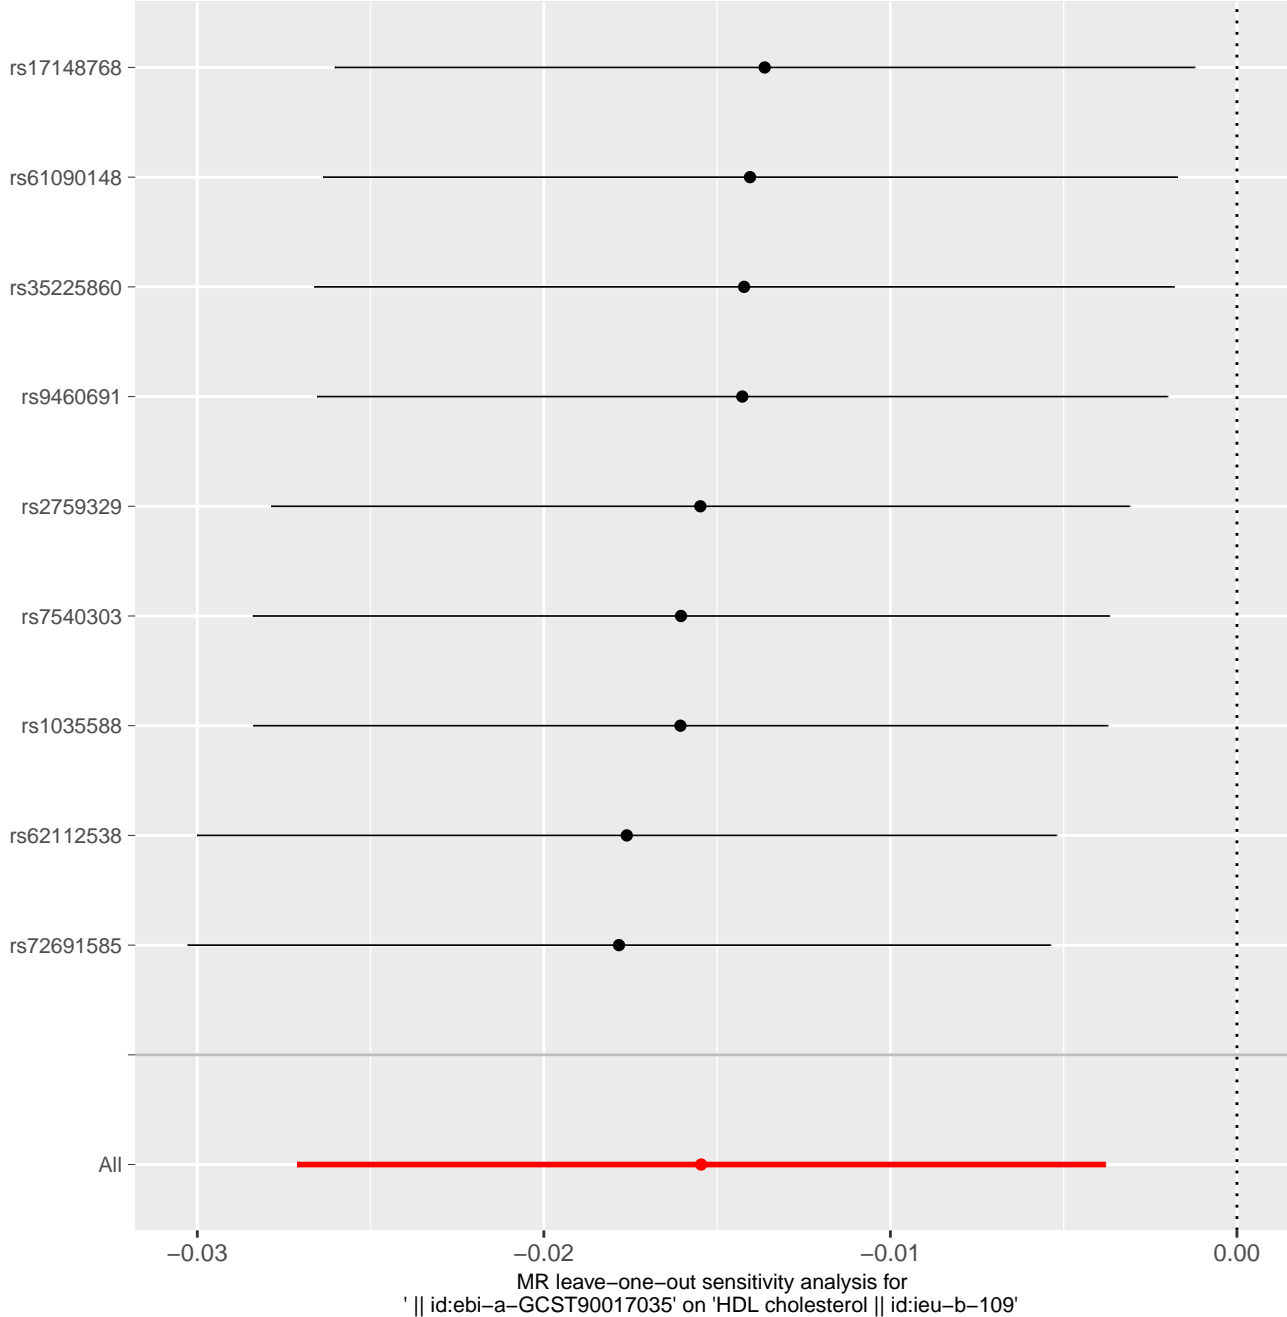

Supplement: Supplementary file 11 [file supplementary]

## Gut microbiota genera and TG

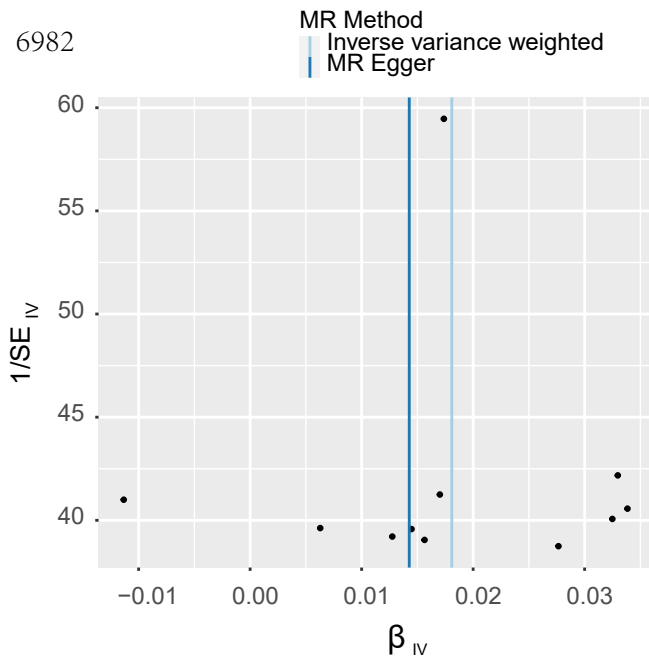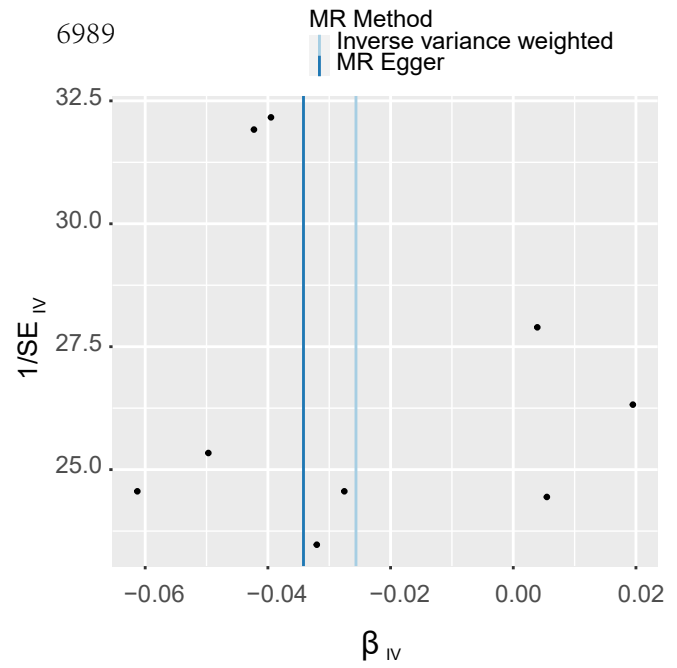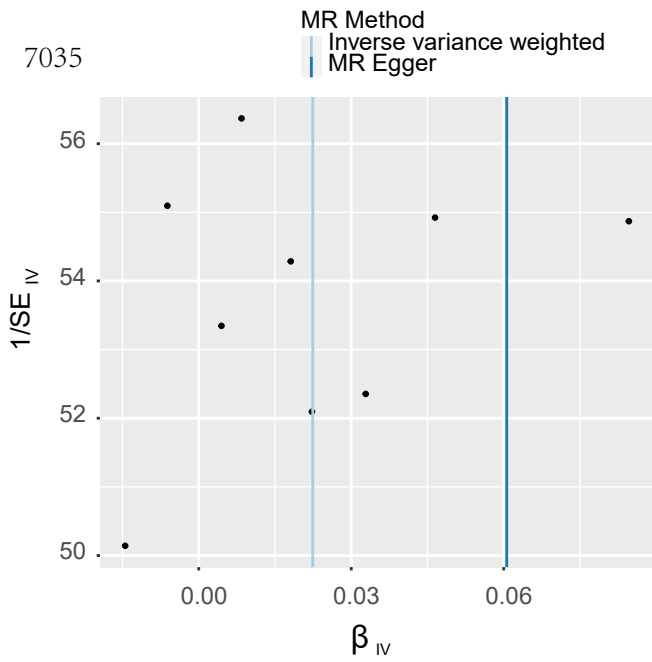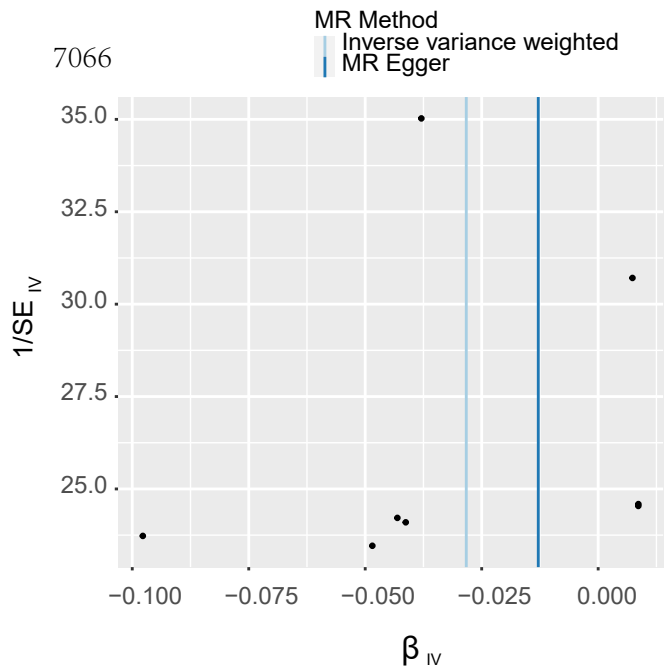

Supplement: Supplementary file 12 [file supplementary]

## Gut microbiota genera and HDL-C

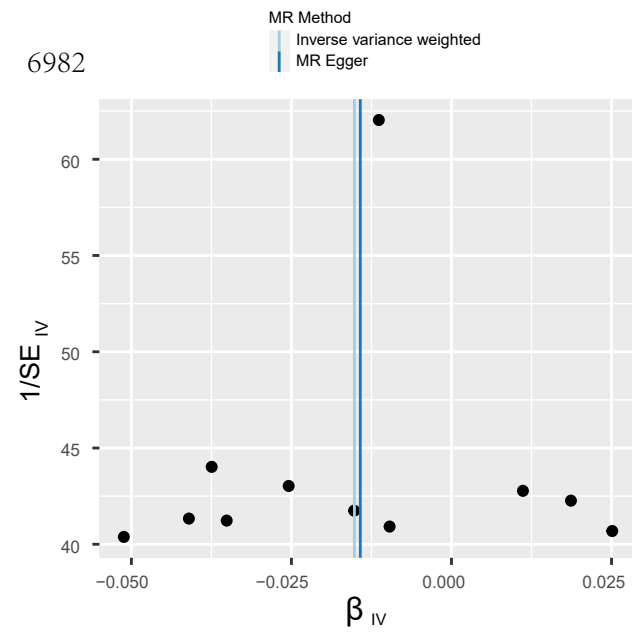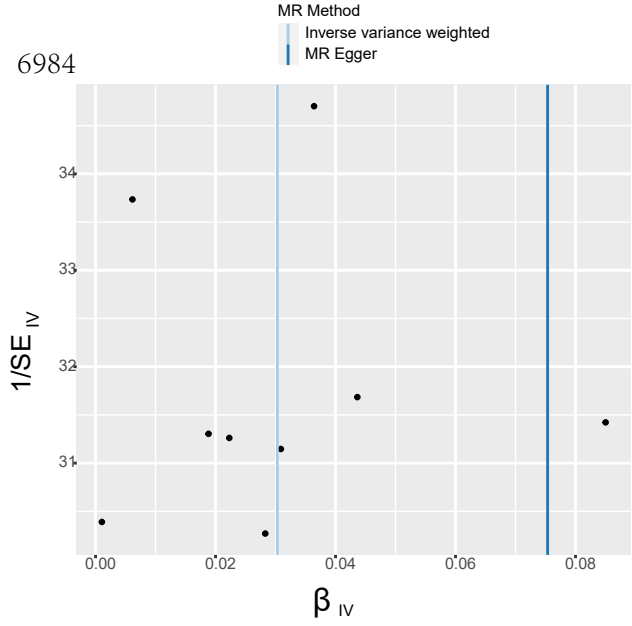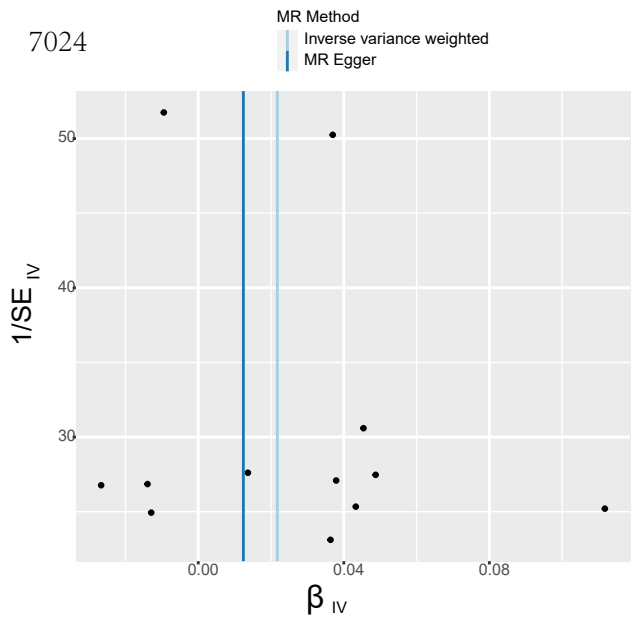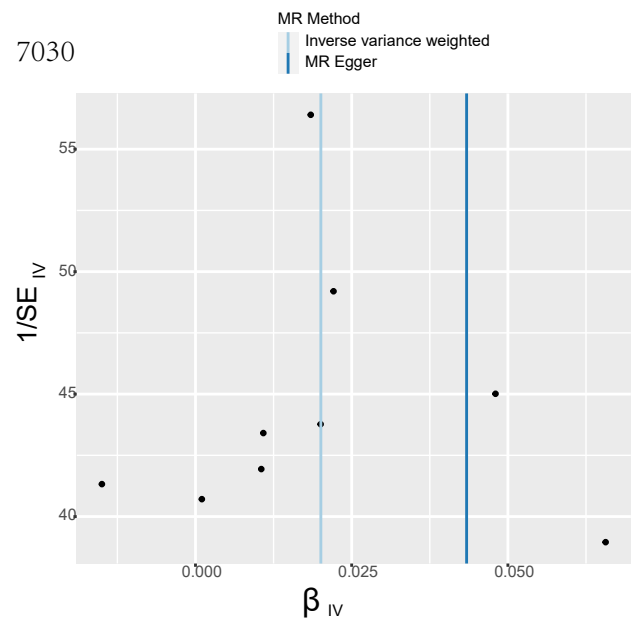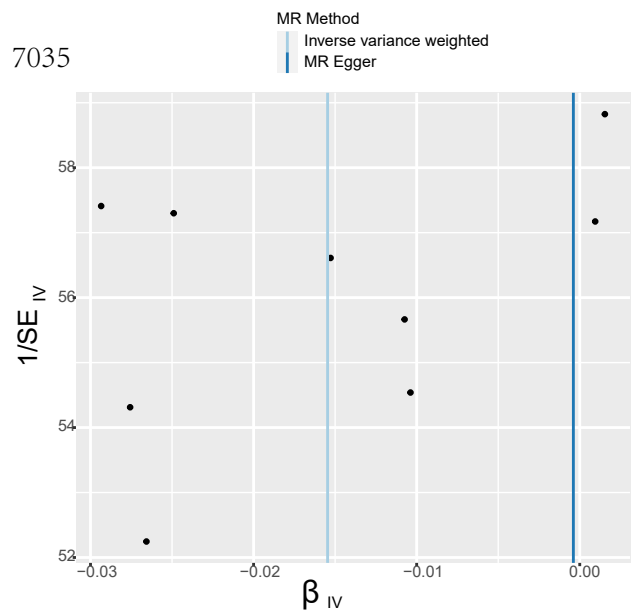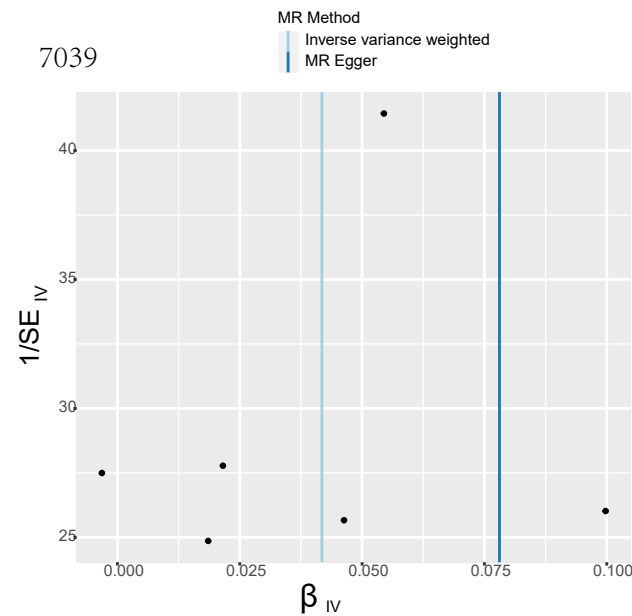

Supplement: Supplementary file 13 [file supplementary]

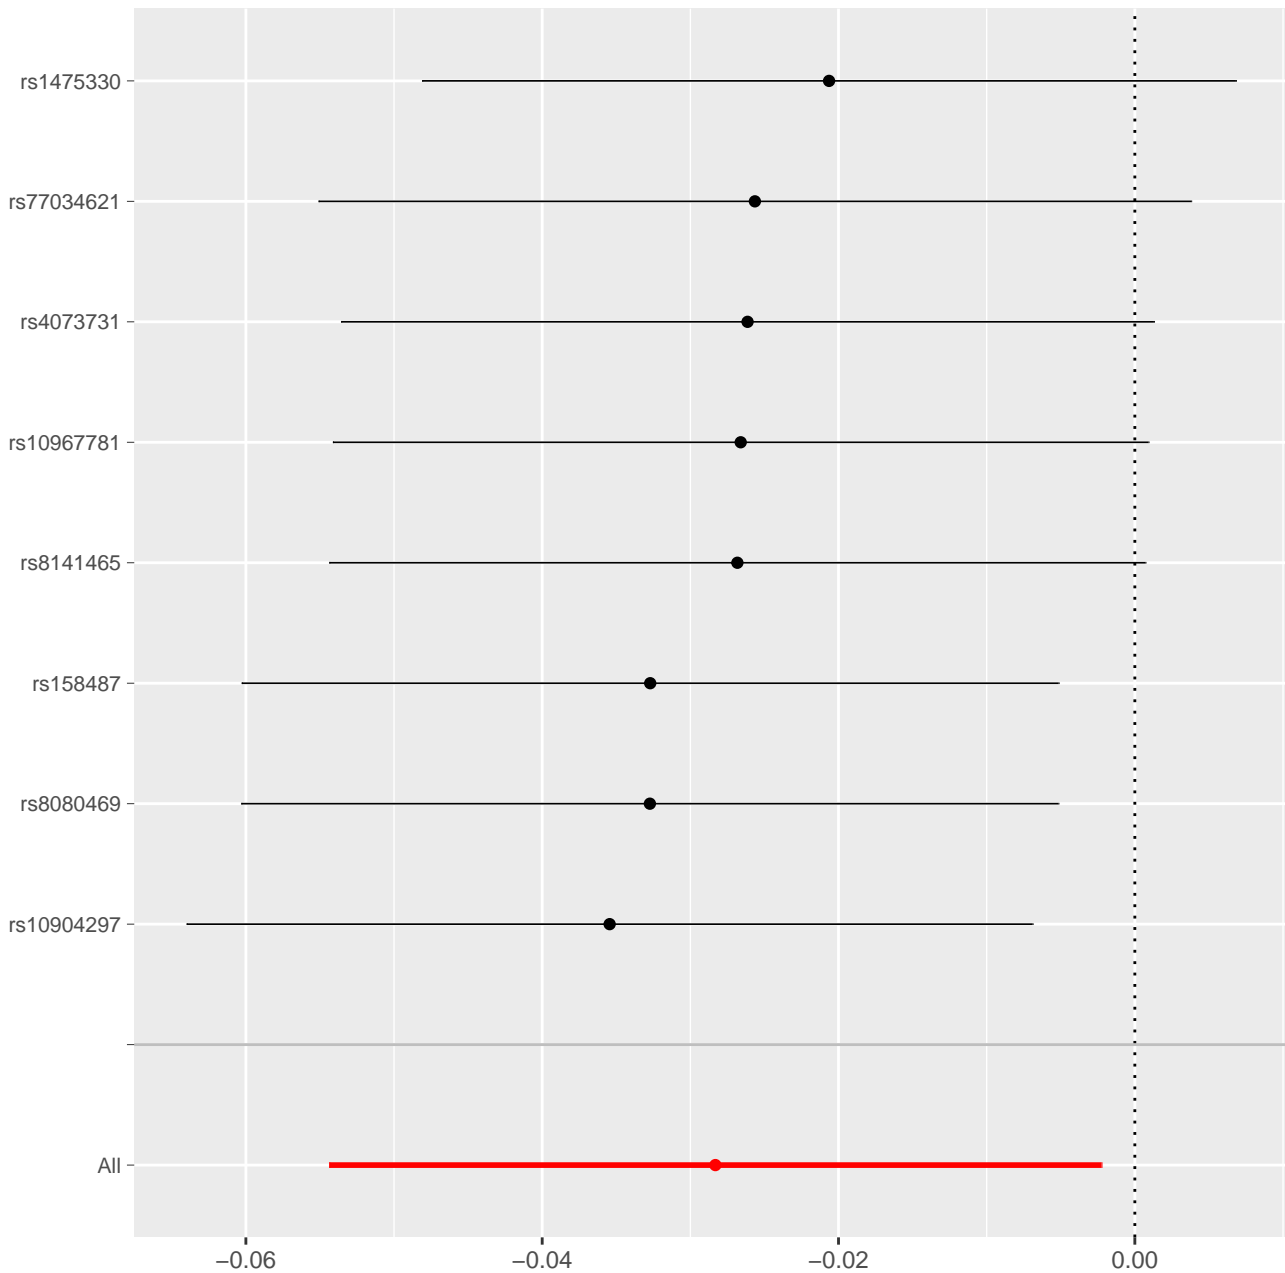

Supplement: Supplementary file 15 [file supplementary]

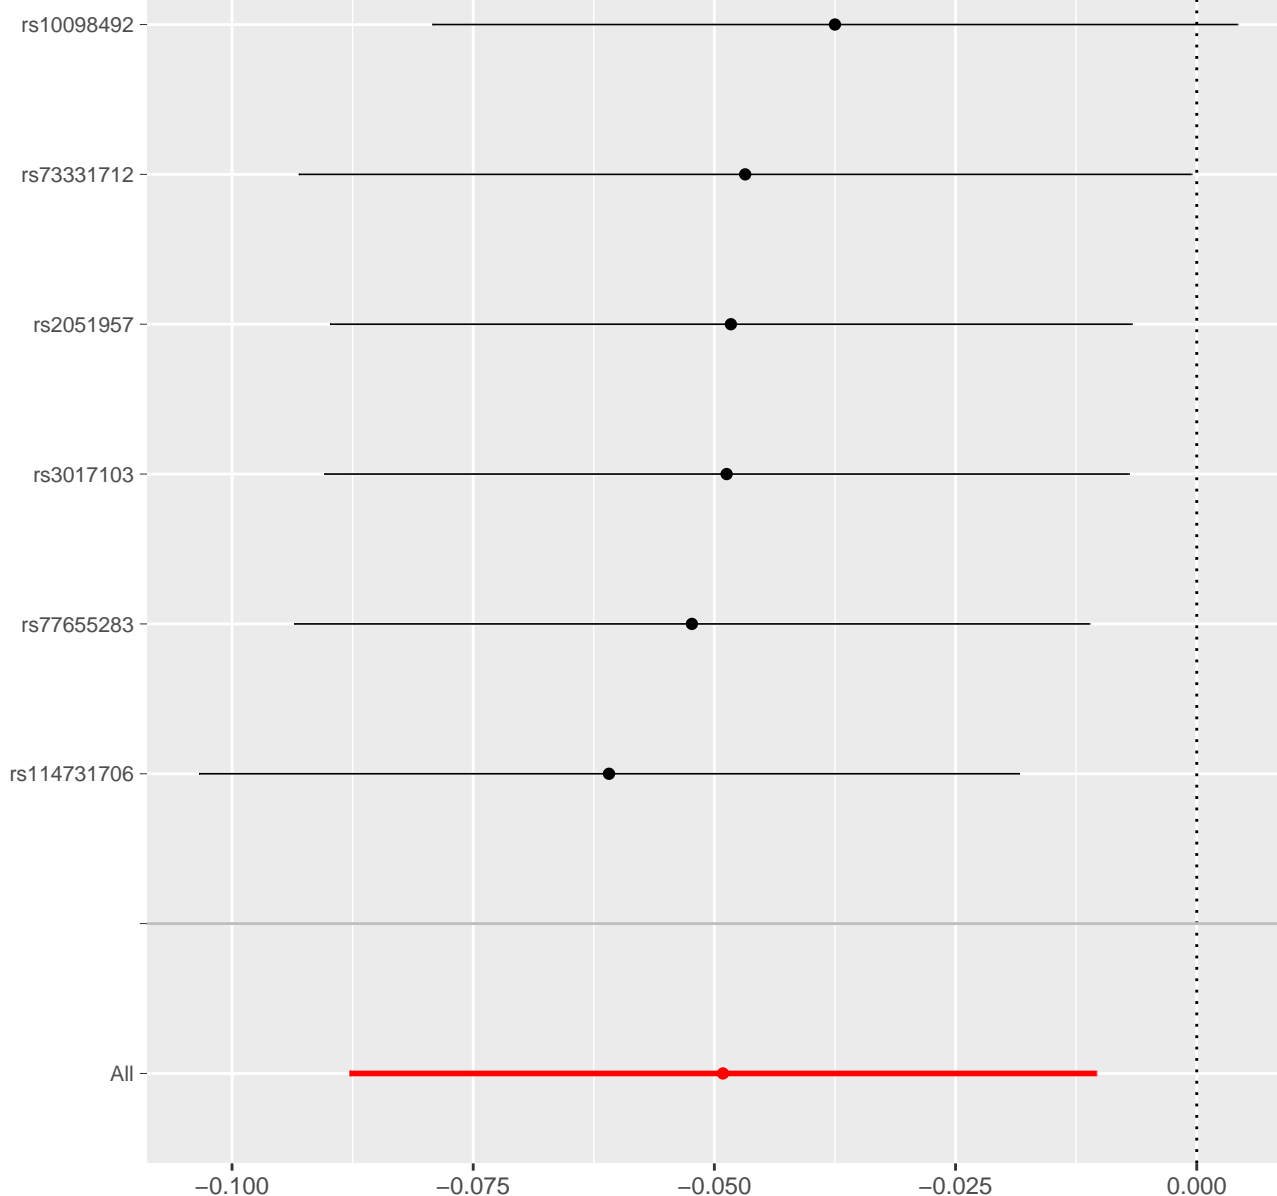

MR leave-one-out sensitivity analysis for  
' || id:ebi-a-GCST90016992' on 'Total cholesterol' || id:met-d-Total\_C'

Supplement: Supplementary file 16 [file supplementary]

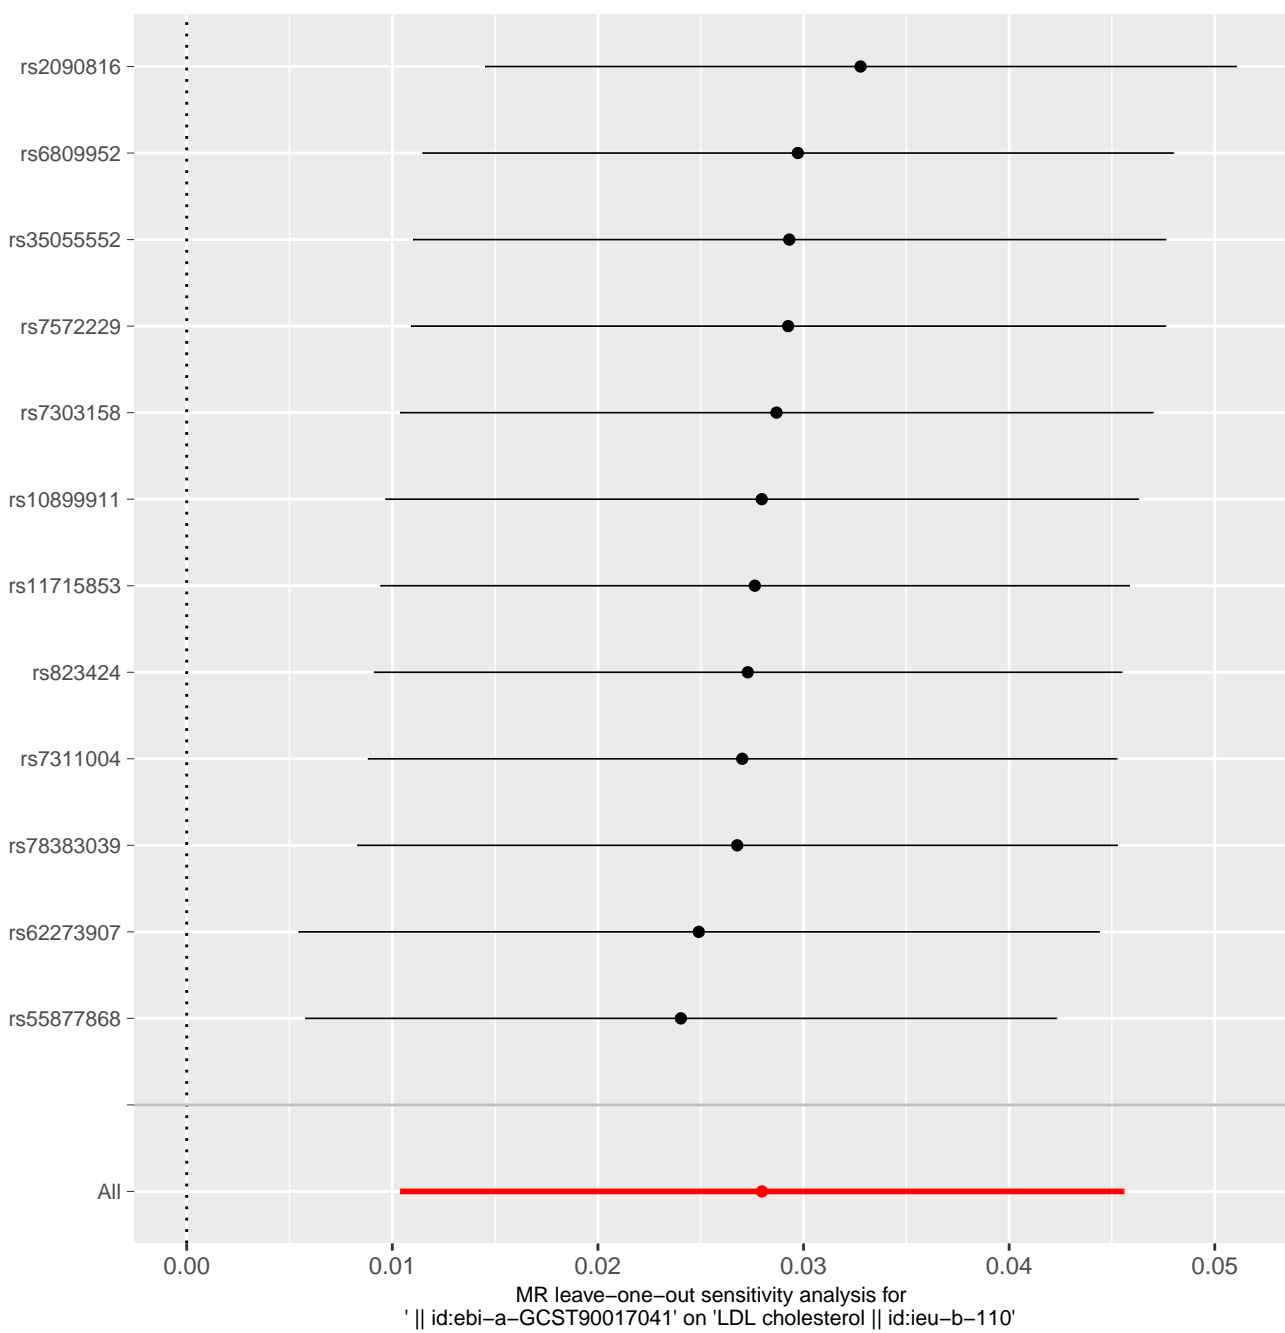

Supplement: Supplementary file 18 [file supplementary]

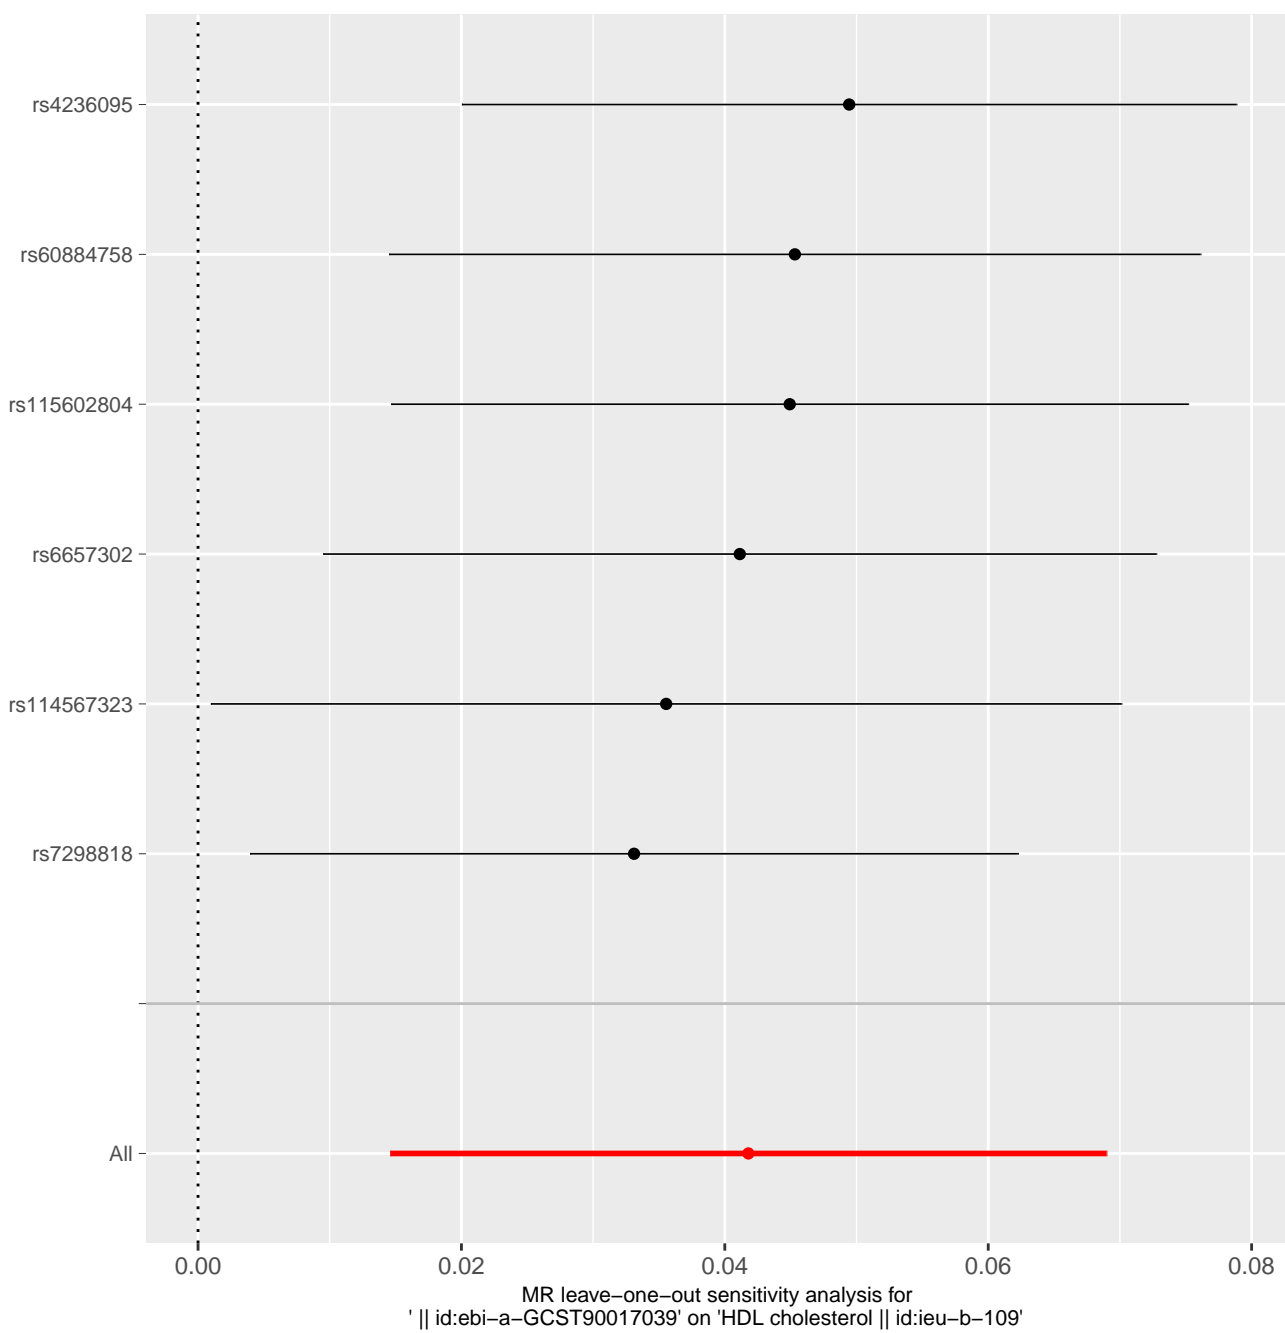

Supplement: Supplementary file 19 [file supplementary]

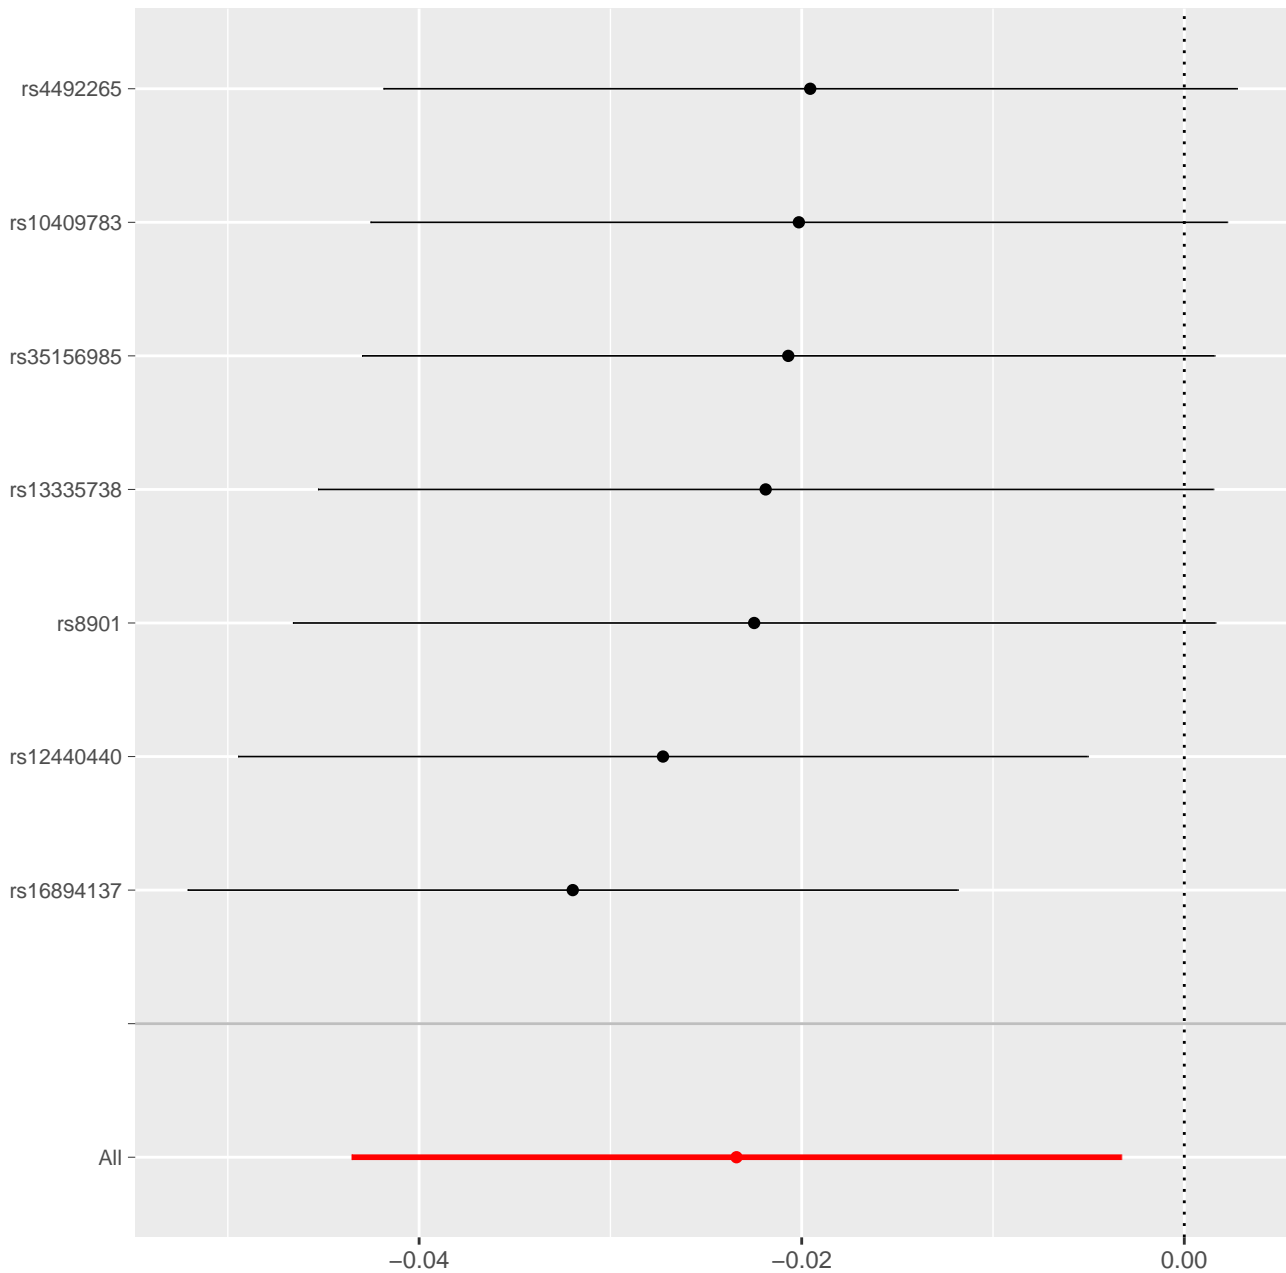

MR leave-one-out sensitivity analysis for  
' || id:ebi-a-GCST90017069' on 'LDL cholesterol || id:ieu-b-110'

Supplement: Supplementary file 20 [file supplementary]

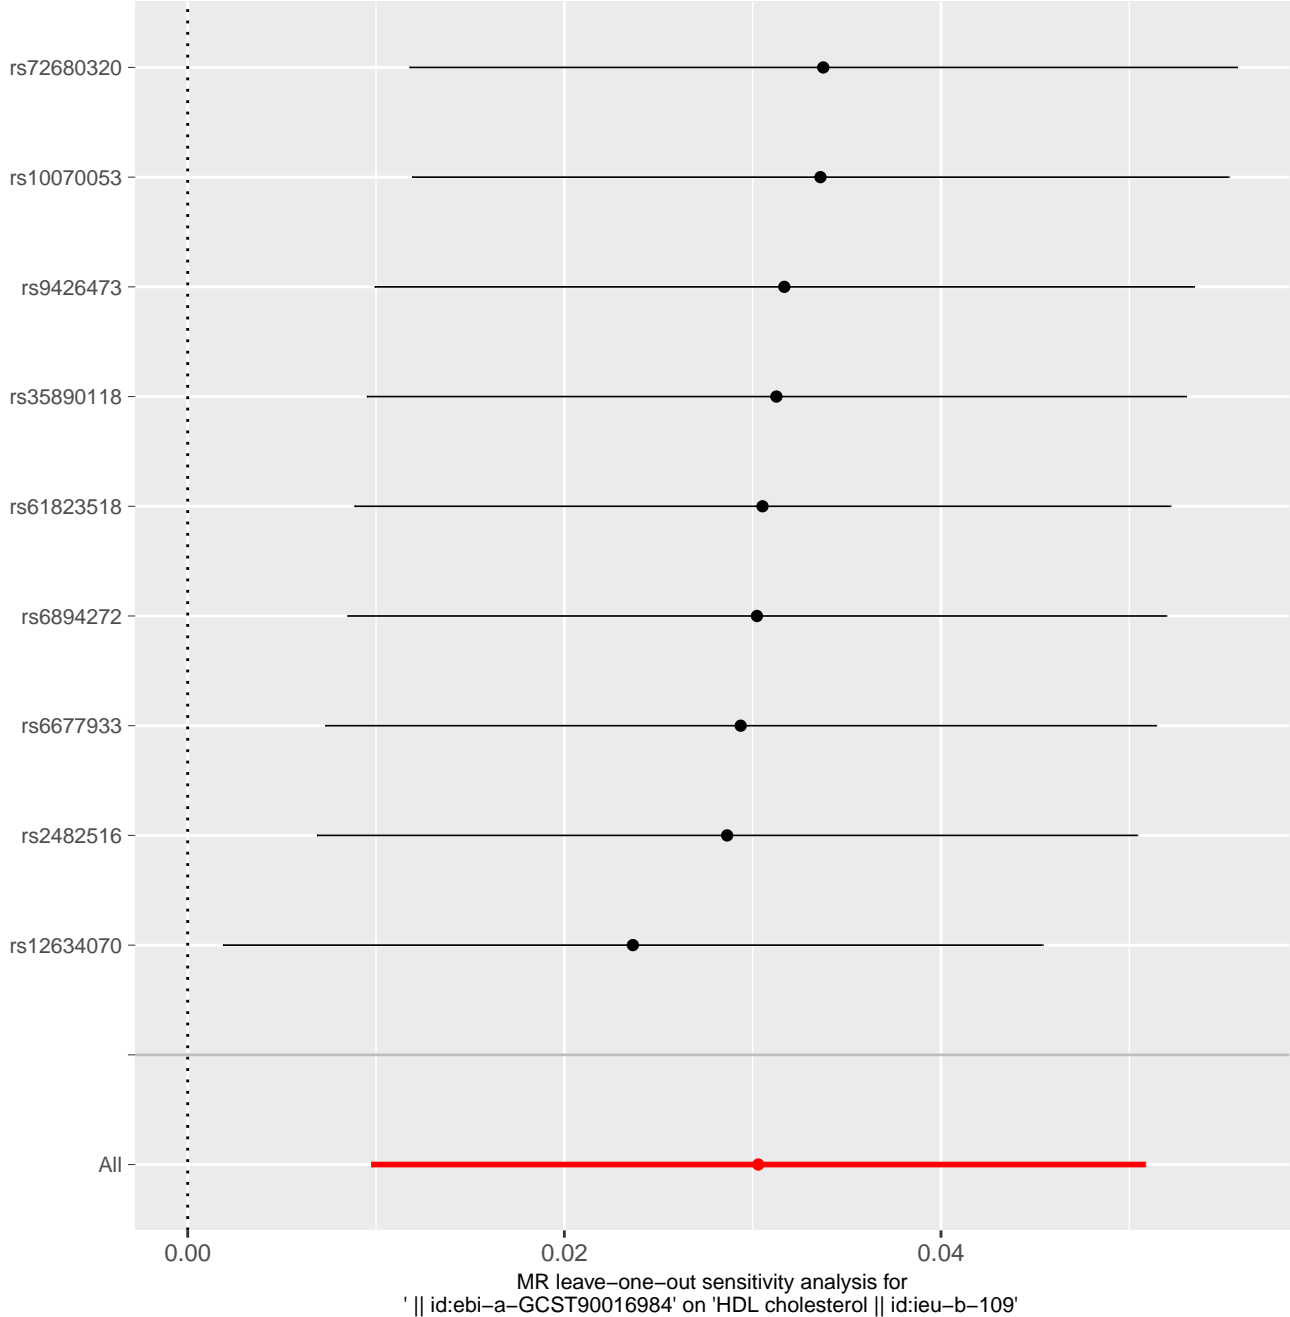

Supplement: Supplementary file 21 [file supplementary]

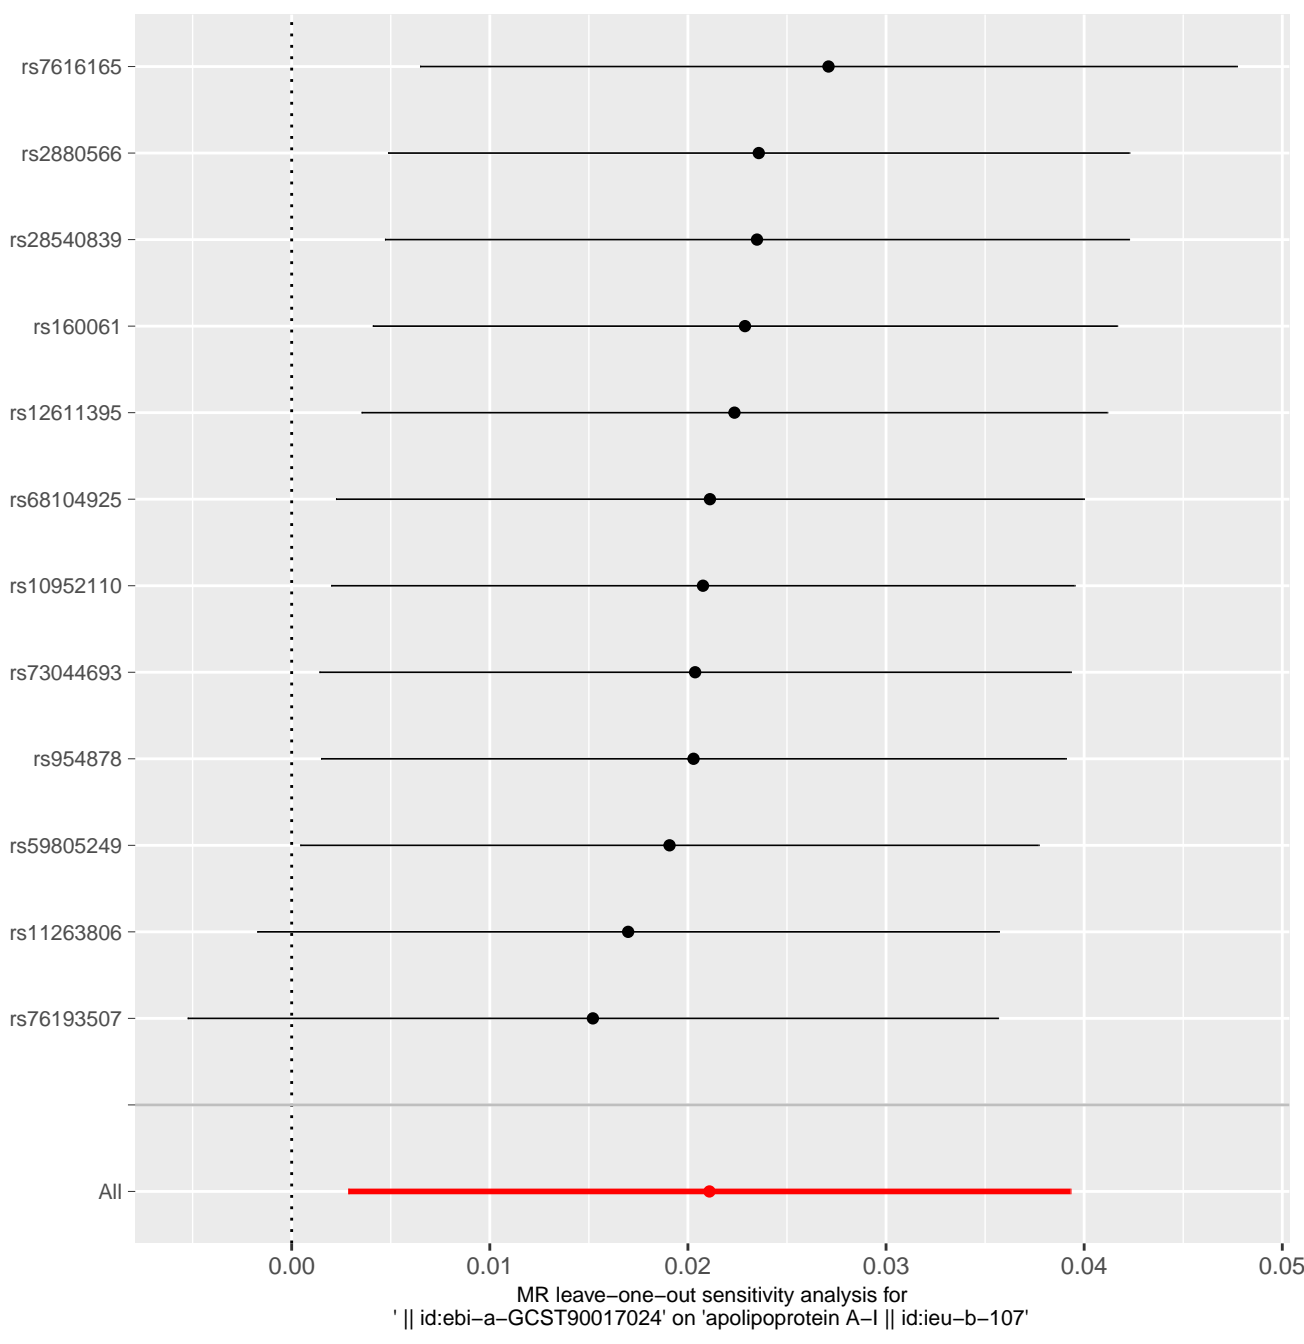

Supplement: Supplementary file 22 [file supplementary]

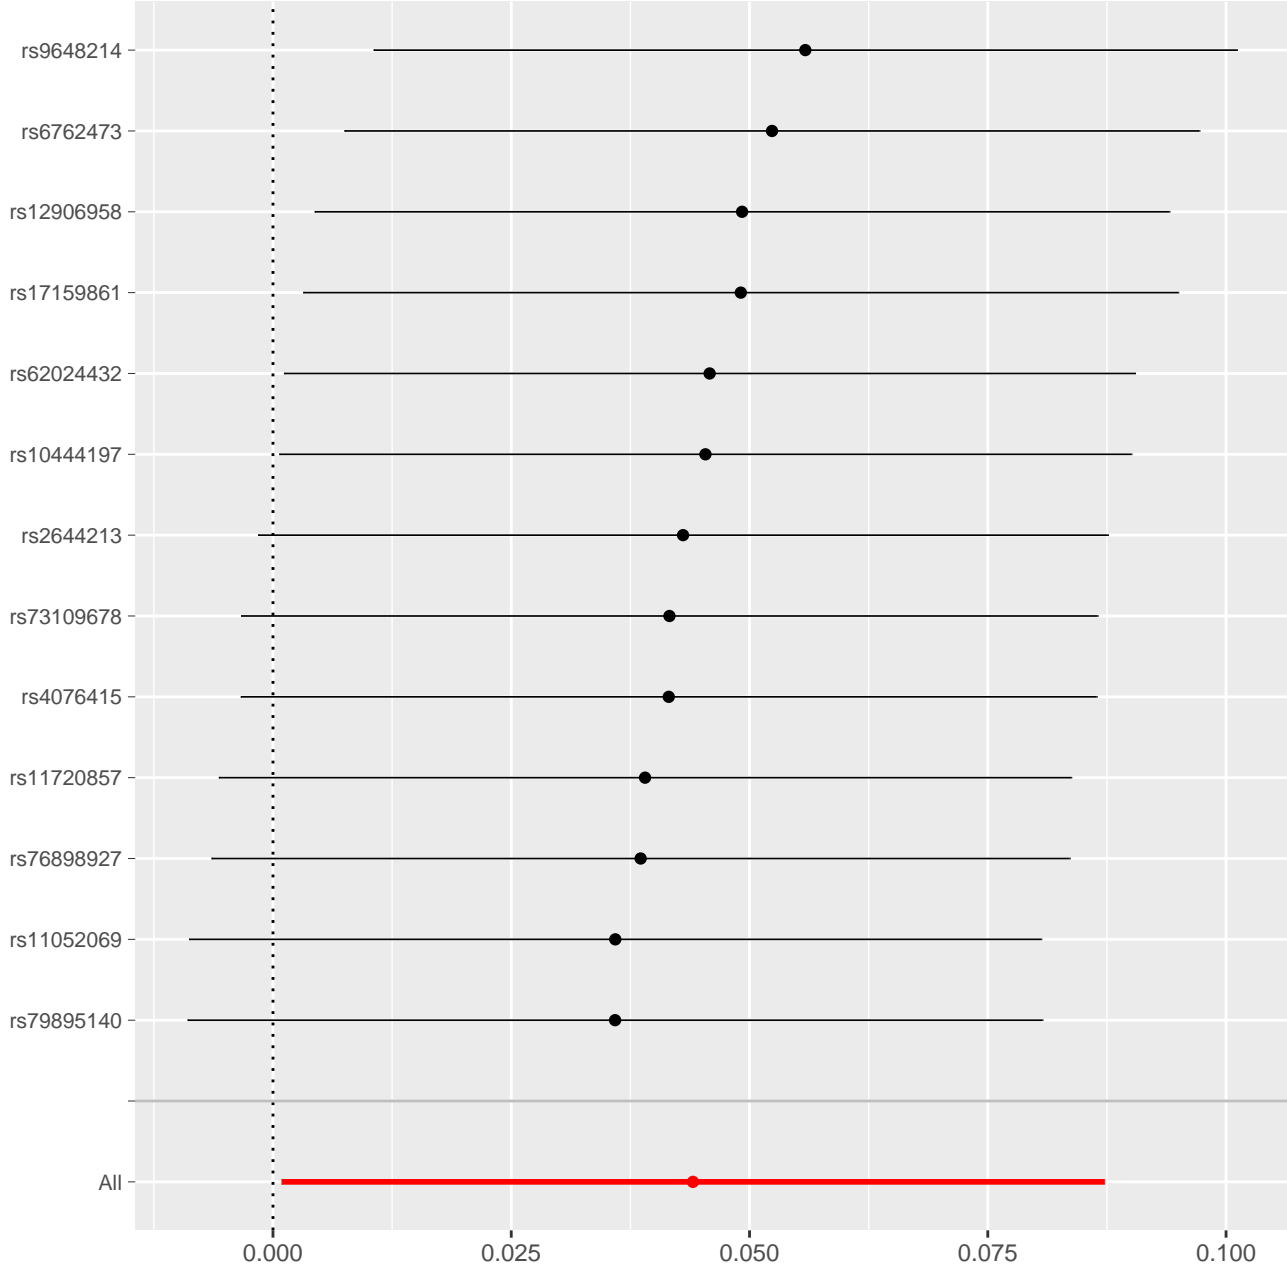

Supplement: Supplementary file 23 [file supplementary]

## Gut microbiota genera and TC

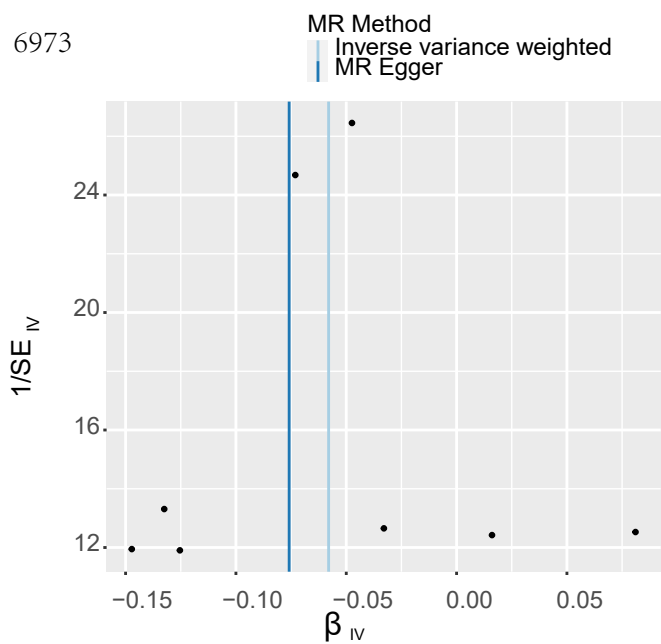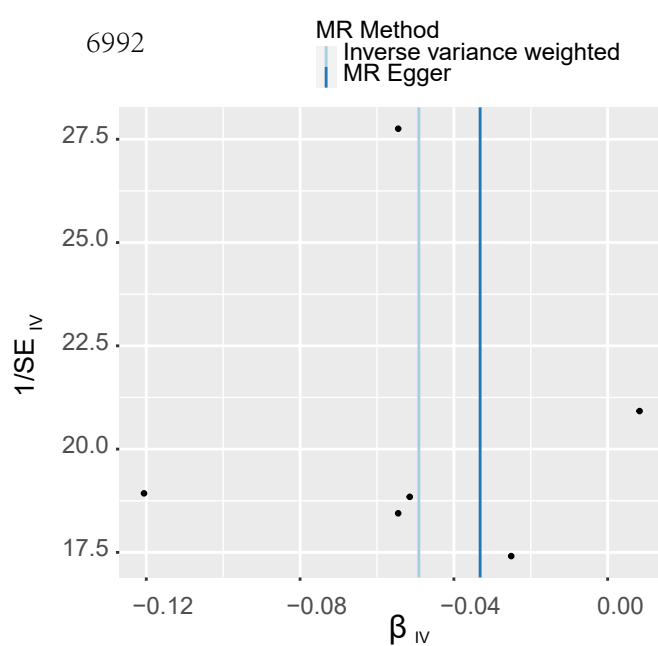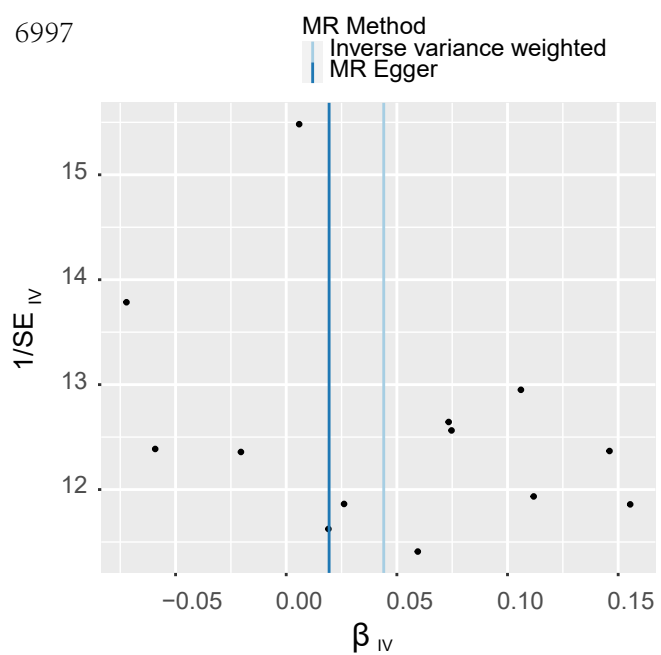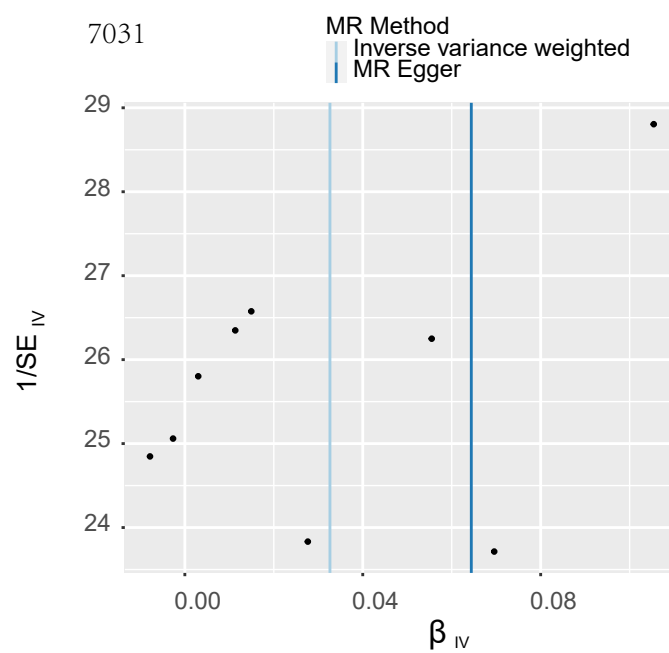

Supplement: Supplementary file 24 [file supplementary]

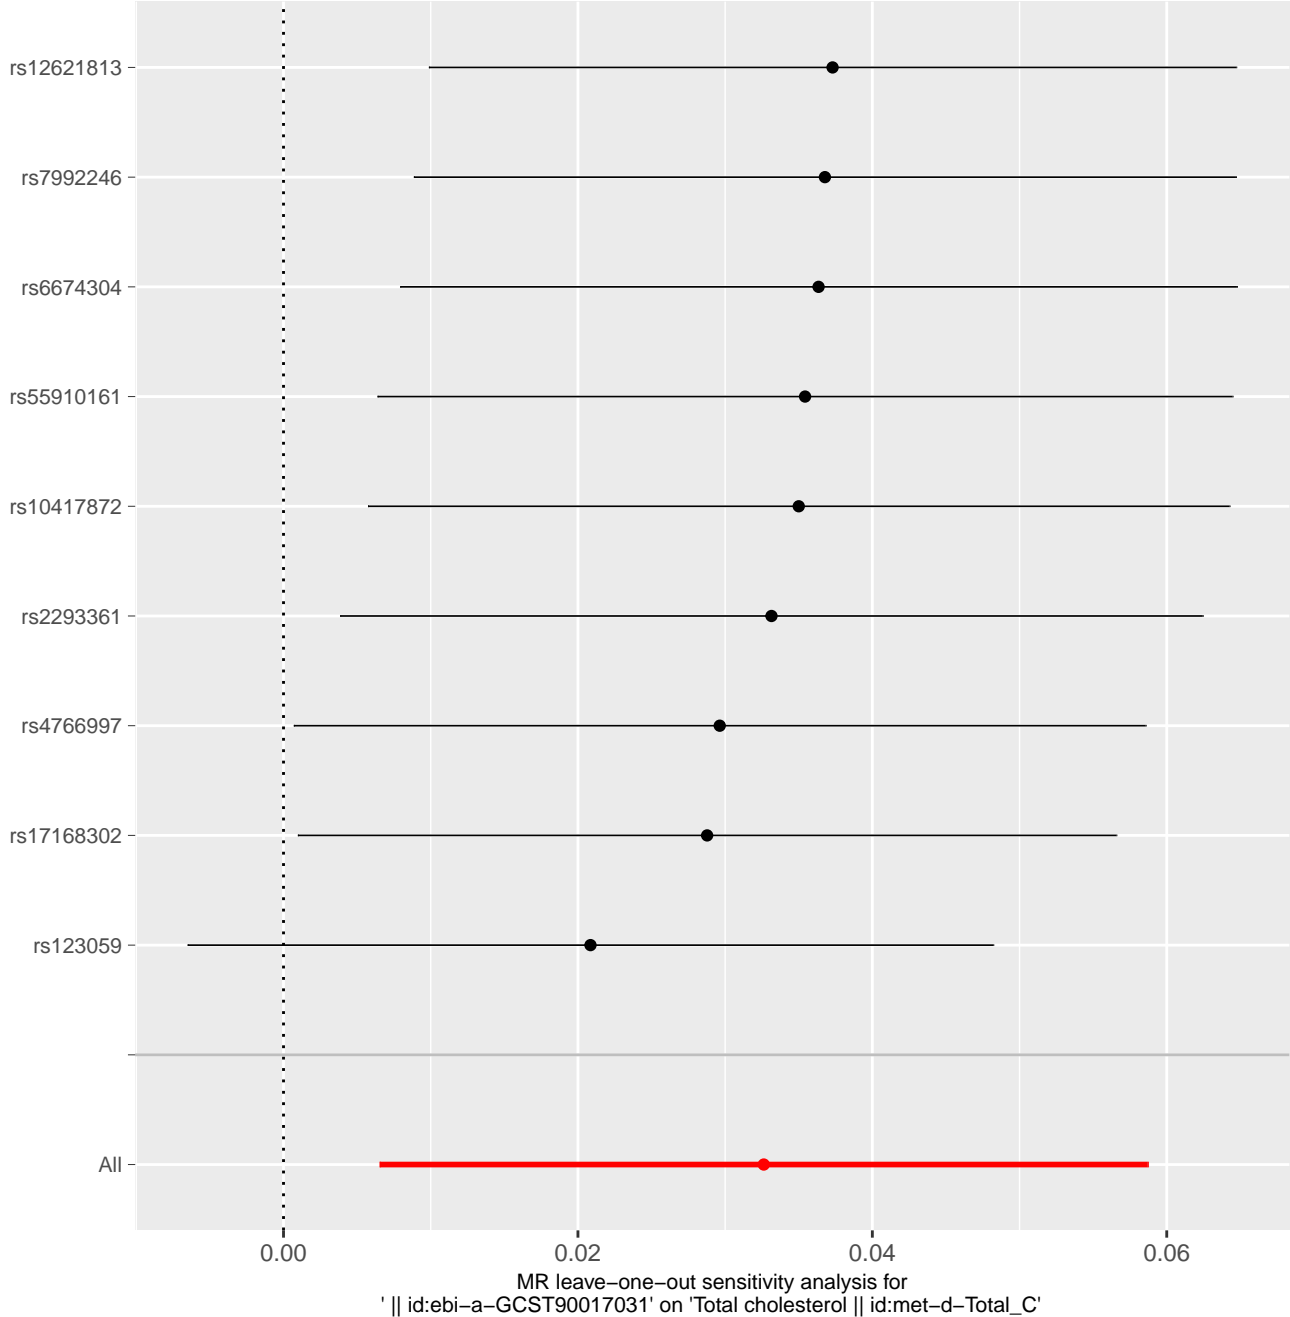

Supplement: Supplementary file 25 [file supplementary]

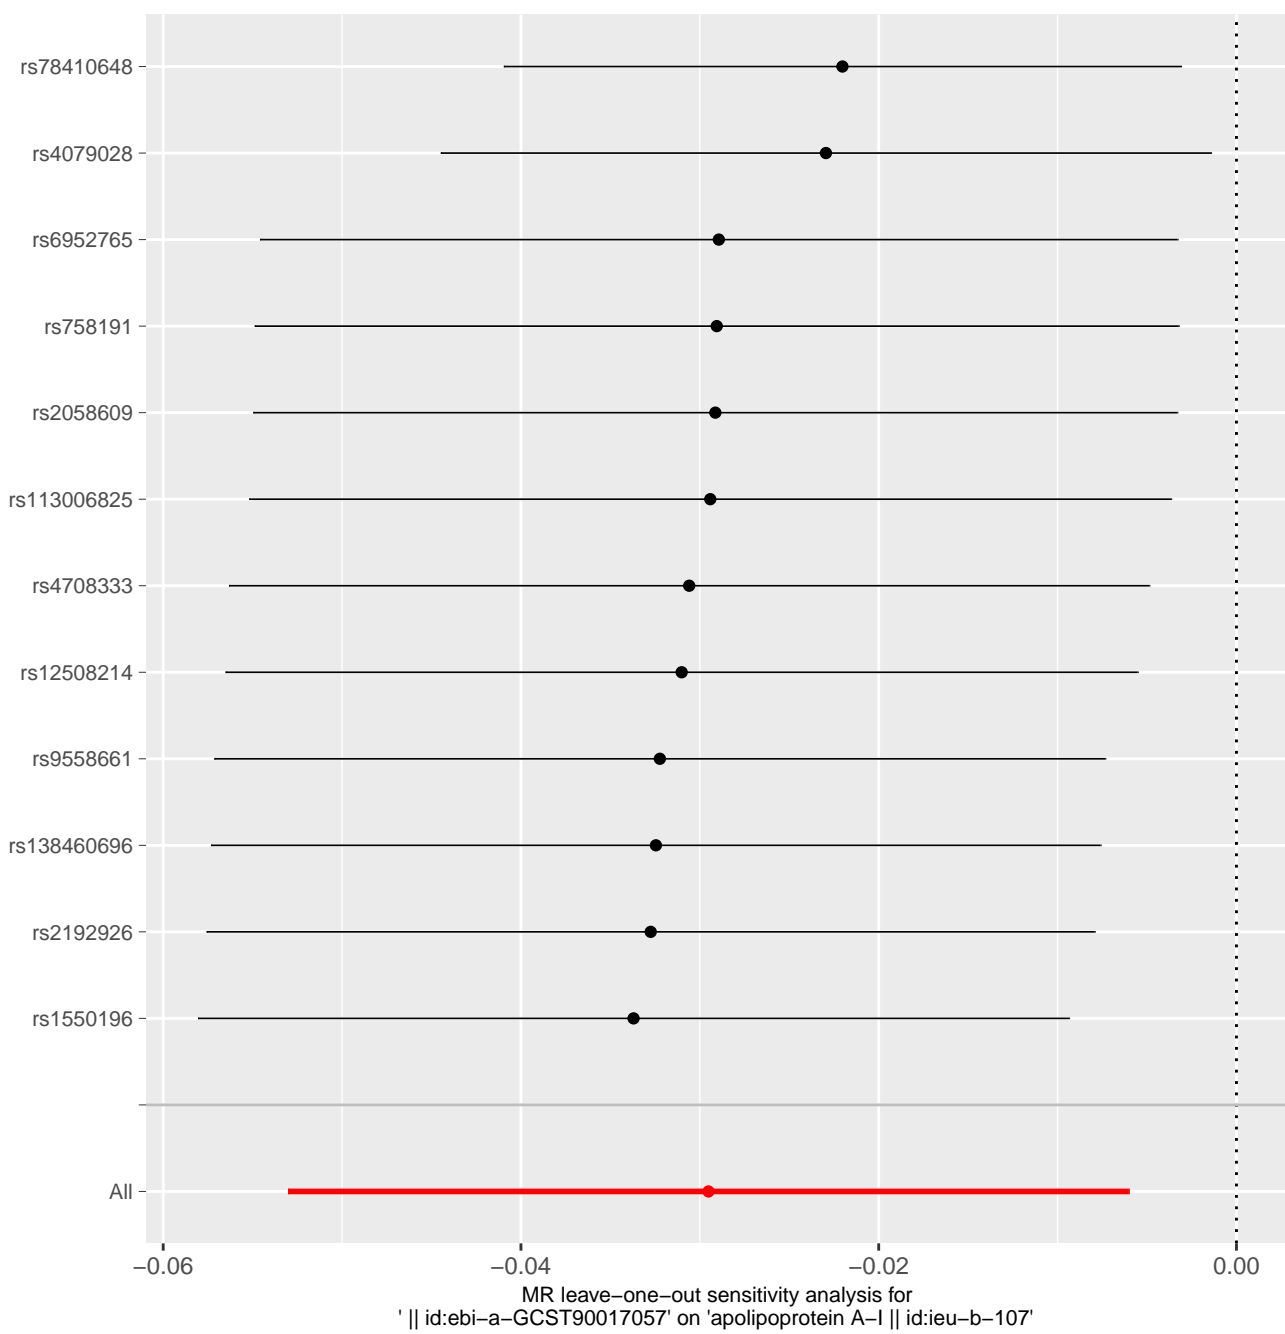

Supplement: Supplementary file 26 [file supplementary]

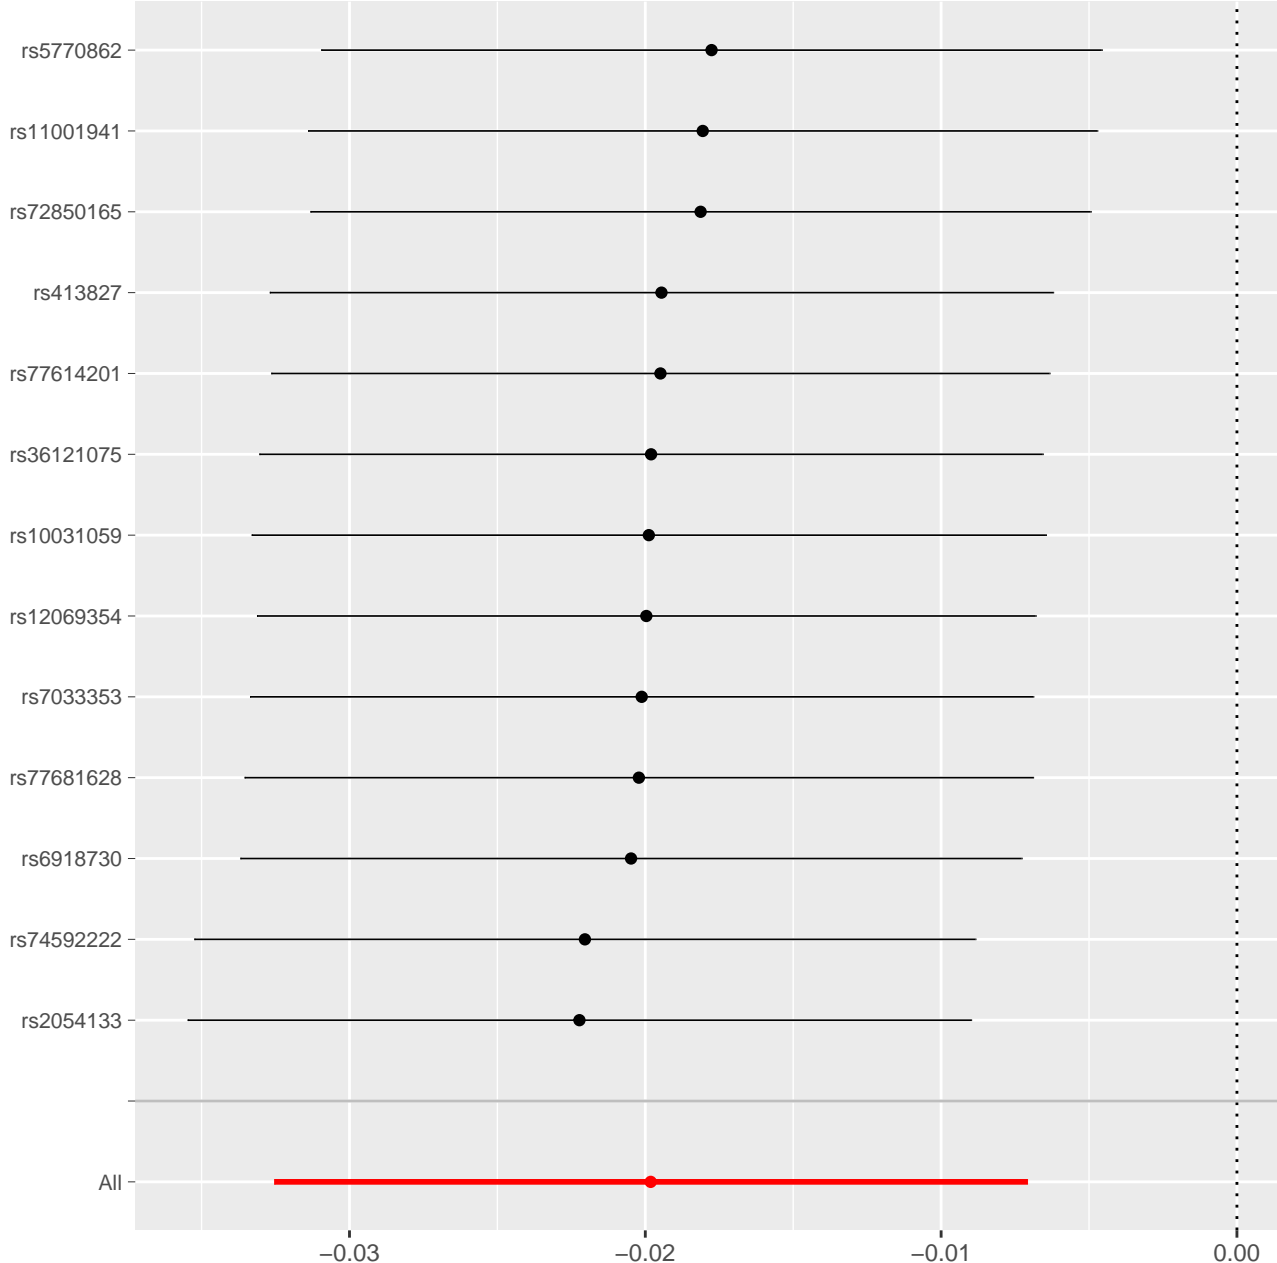

Supplement: Supplementary file 27 [file supplementary]

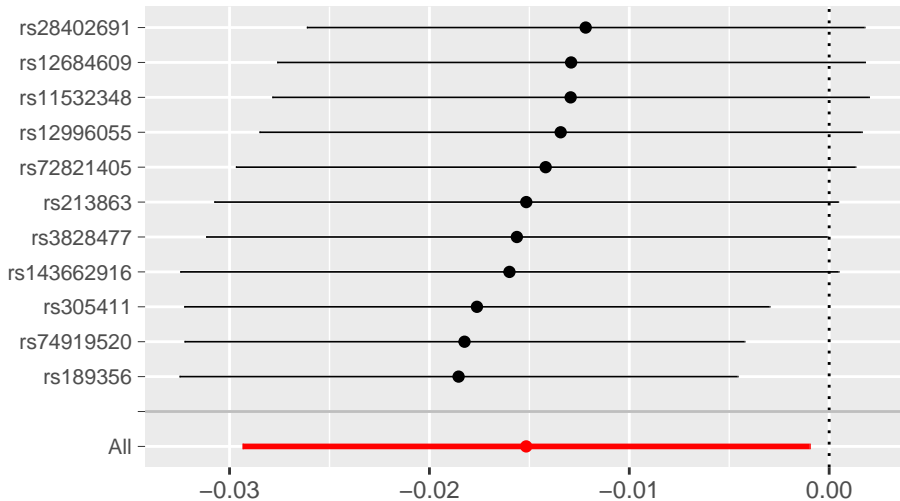

MR leave-one-out sensitivity analysis for  
' || id:ebi-a-GCST90016982' on 'HDL cholesterol || id:ieu-b-109'

Supplement: Supplementary file 29 [file supplementary]

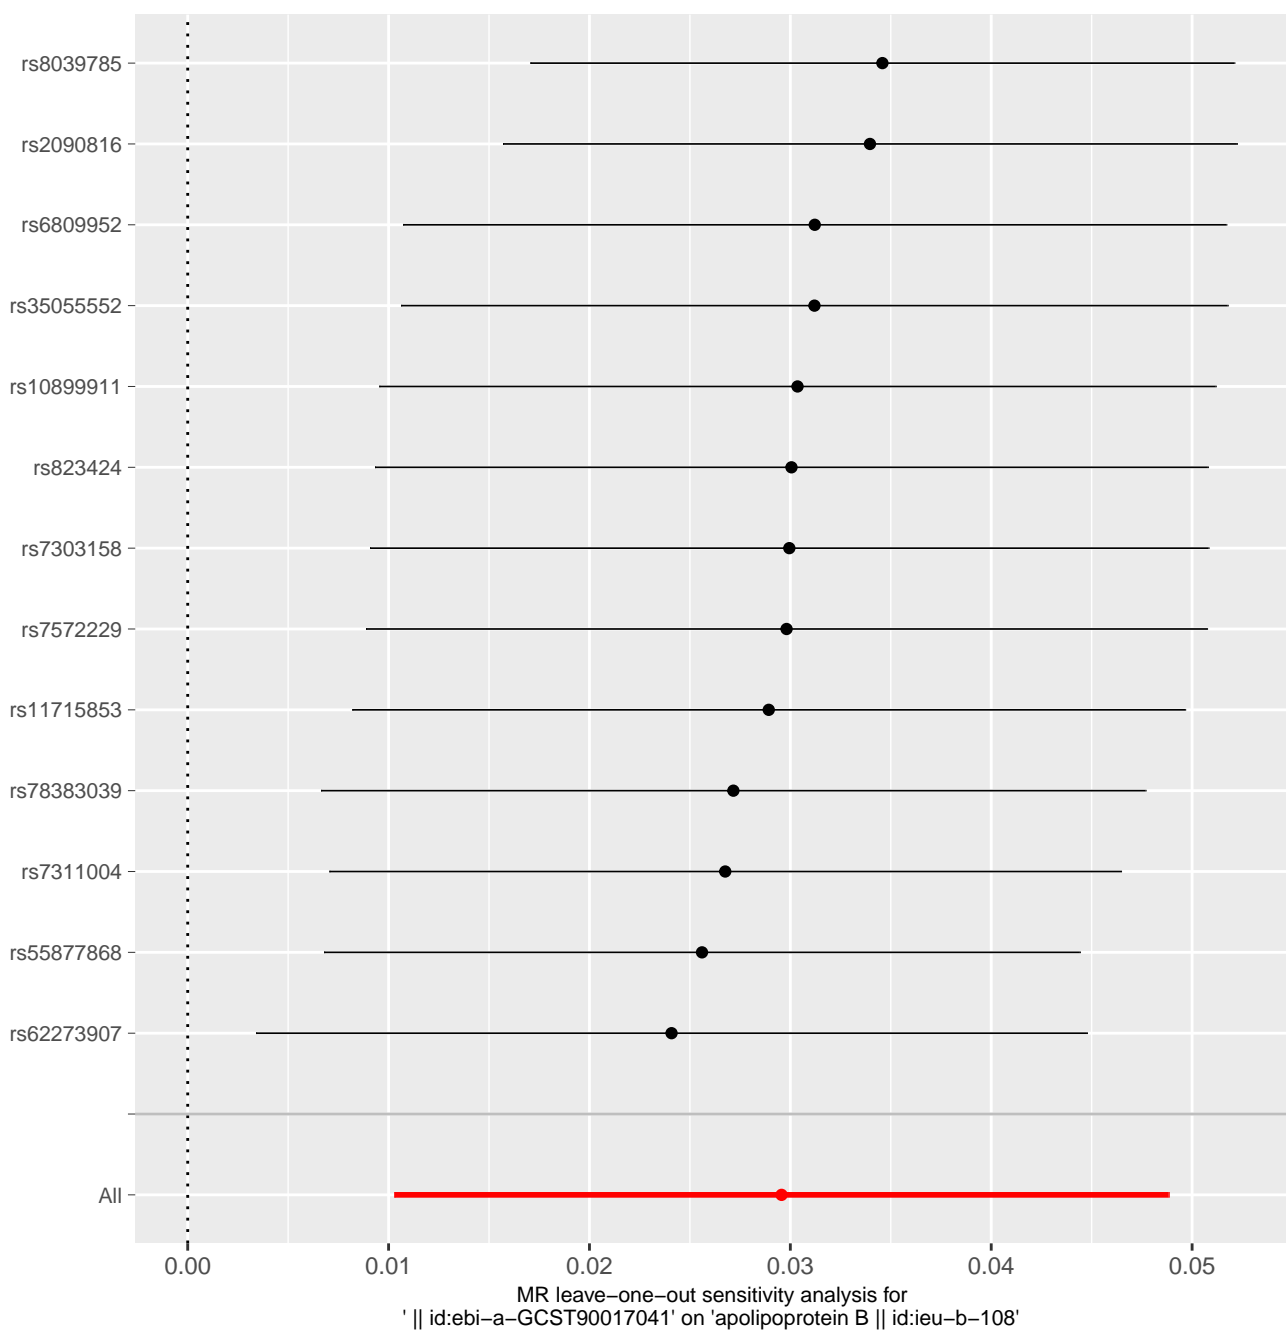

Supplement: Supplementary file 30 [file supplementary]

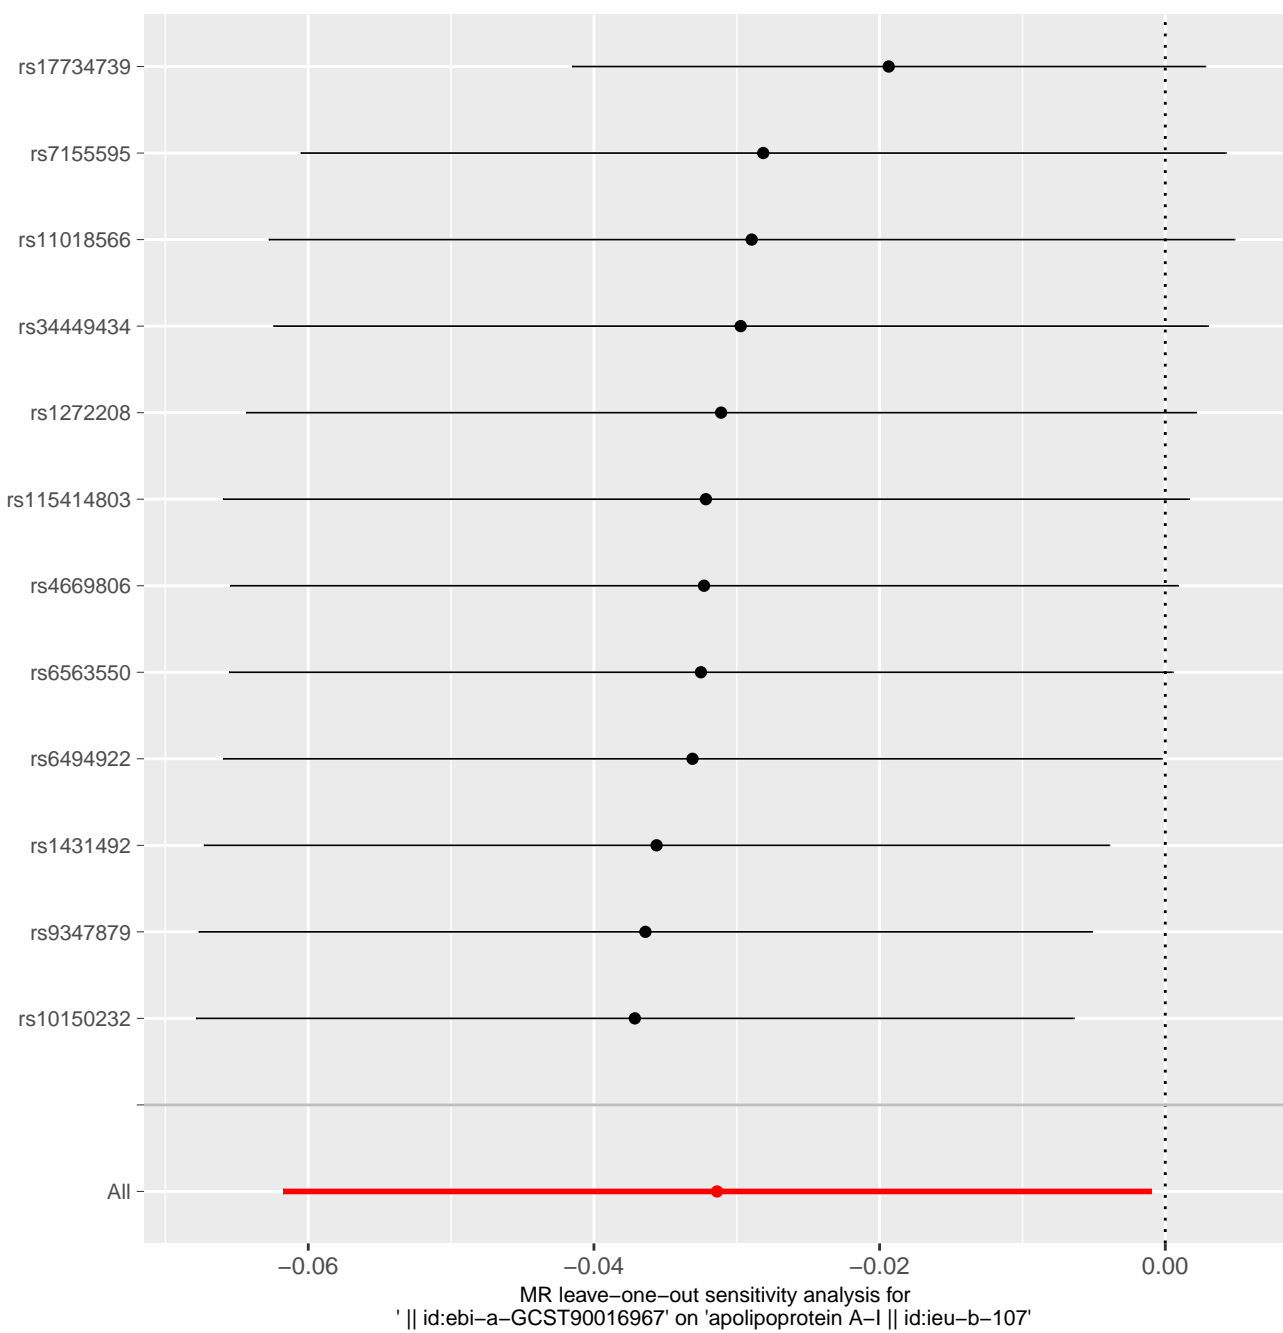

Supplement: Supplementary file 31 [file supplementary]

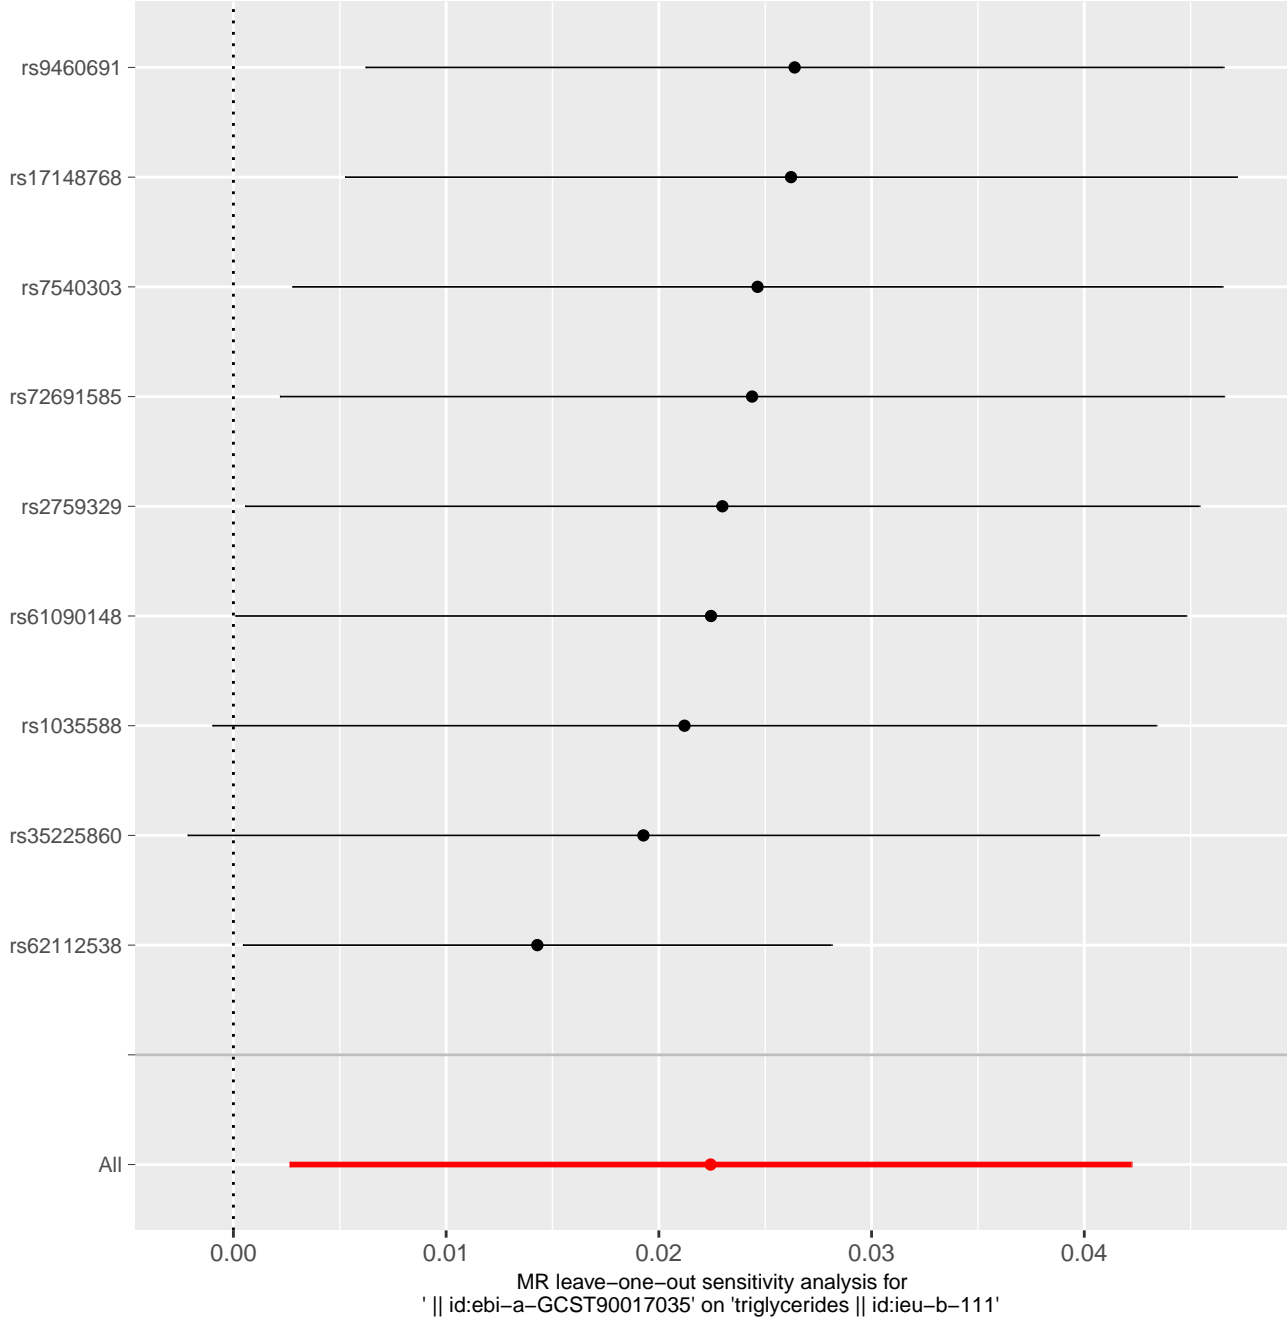

Supplement: Supplementary file 32 [file supplementary]

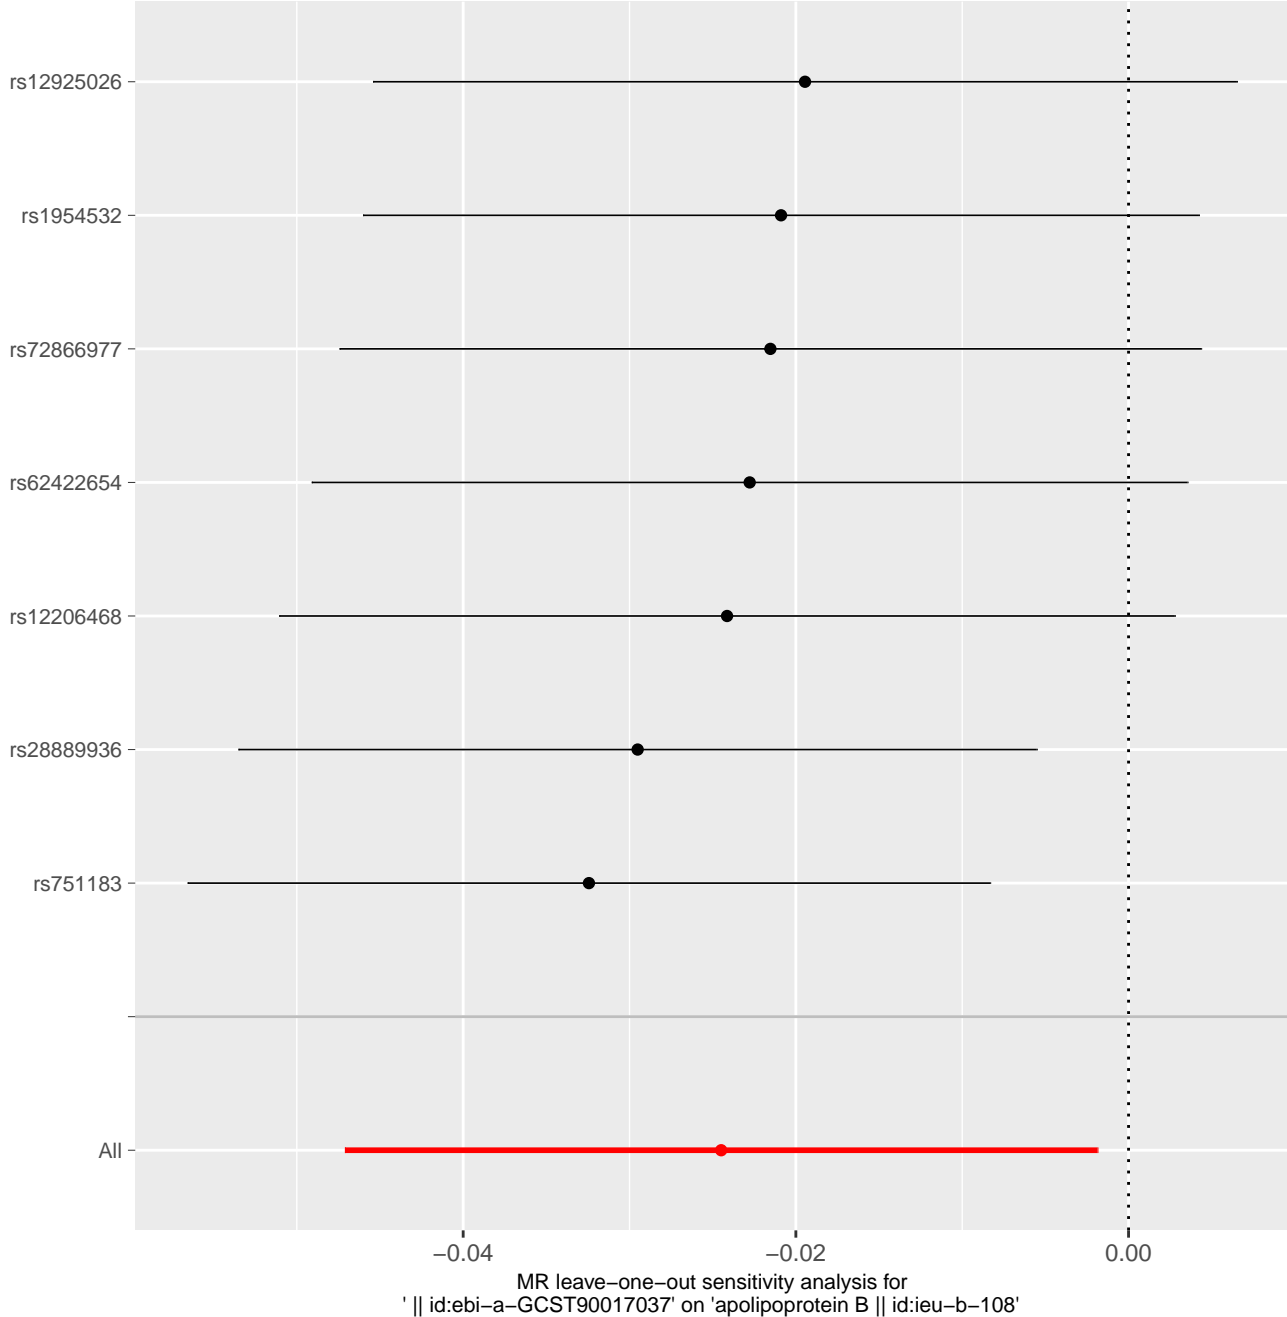

Supplement: Supplementary file 33 [file supplementary]

# Gut microbiota genera and LDL-C

7041

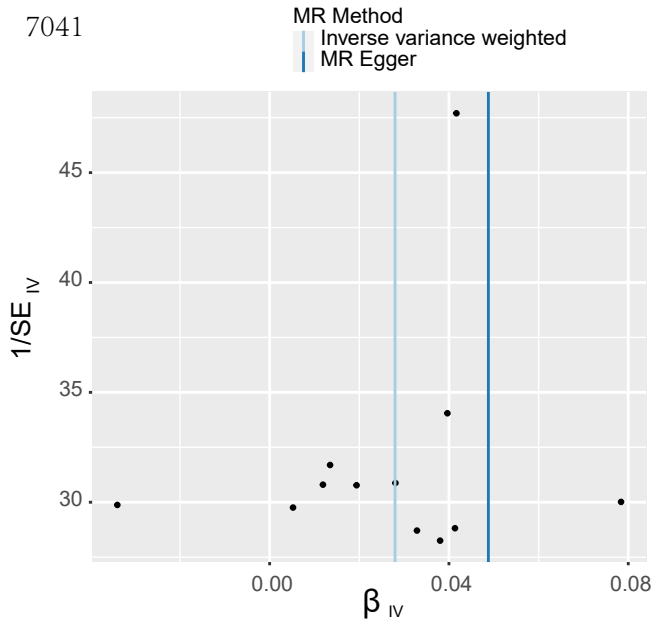

7042

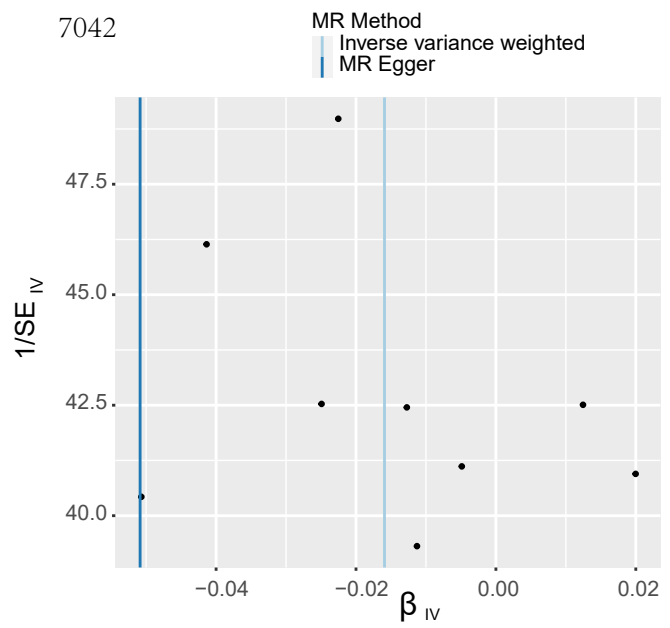

7063

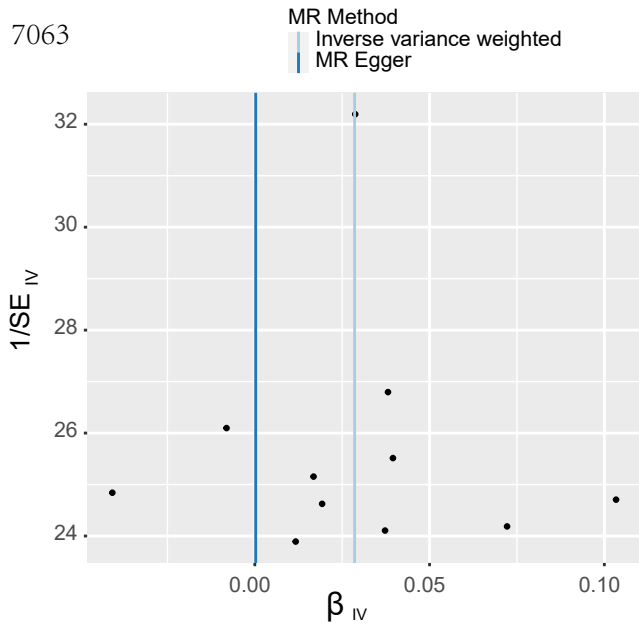

7069

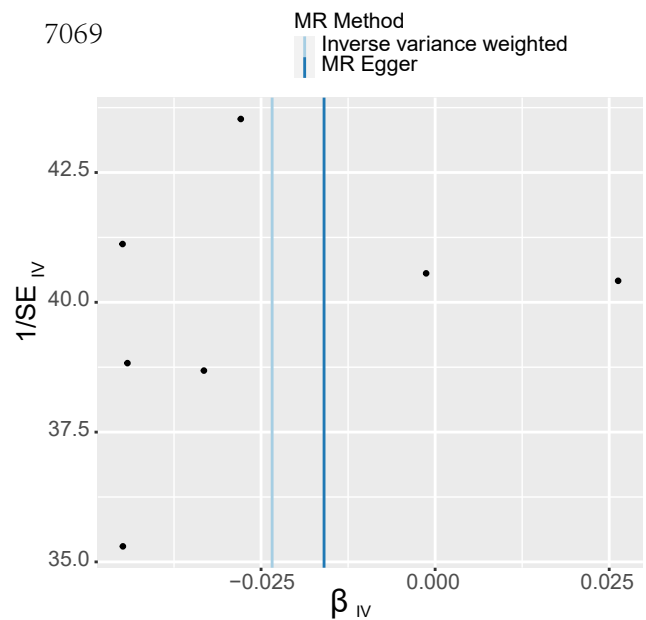

7073

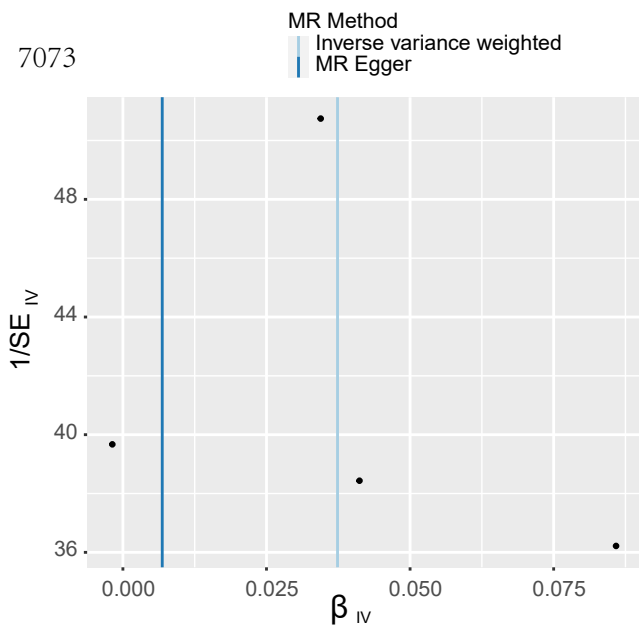

Supplement: Supplementary file 34 [file supplementary]

# Gut microbiota genera and APOB

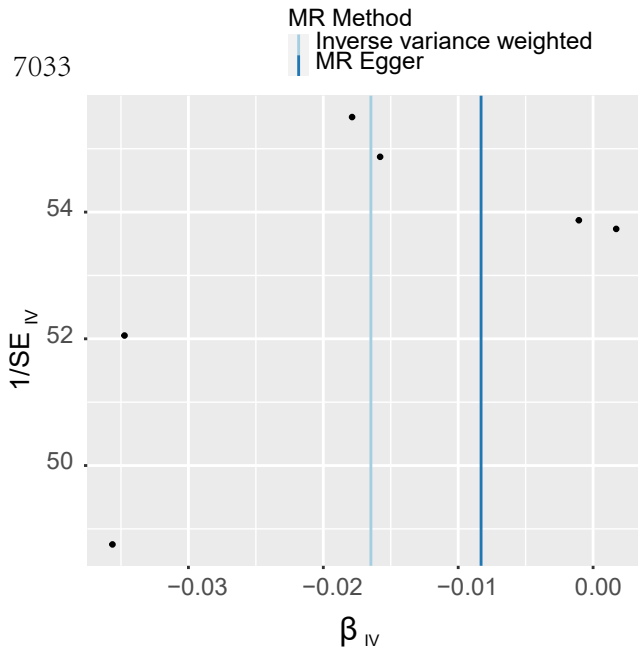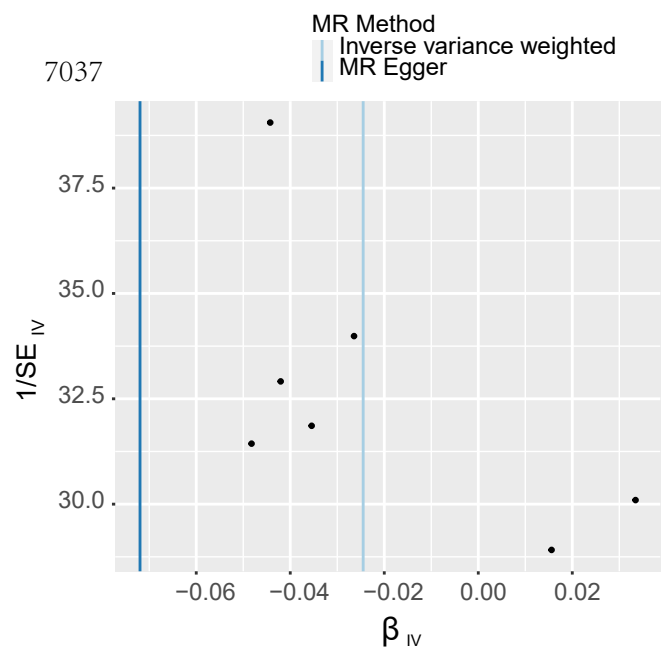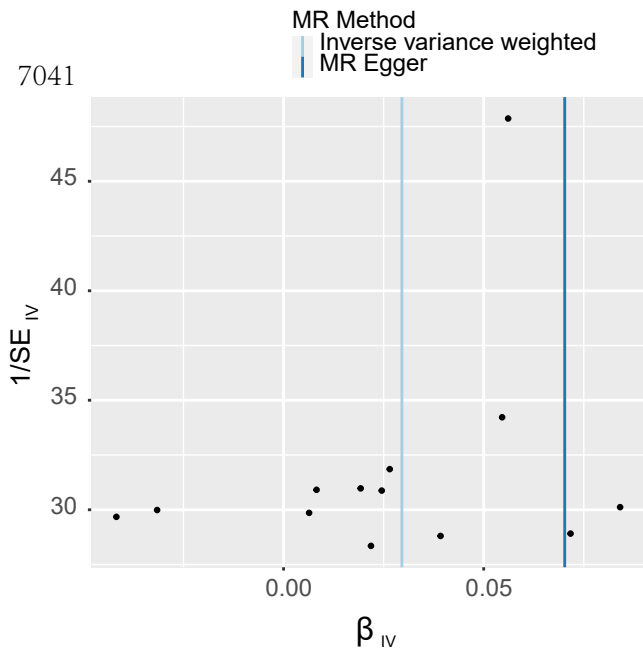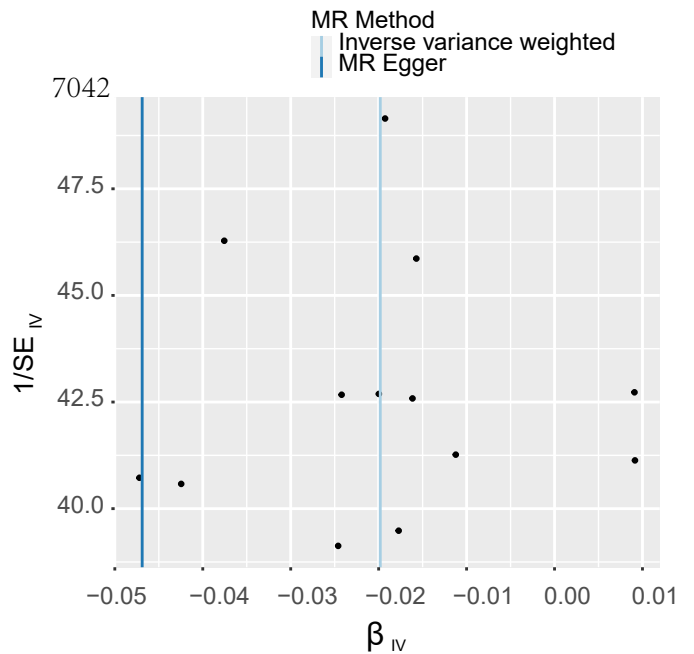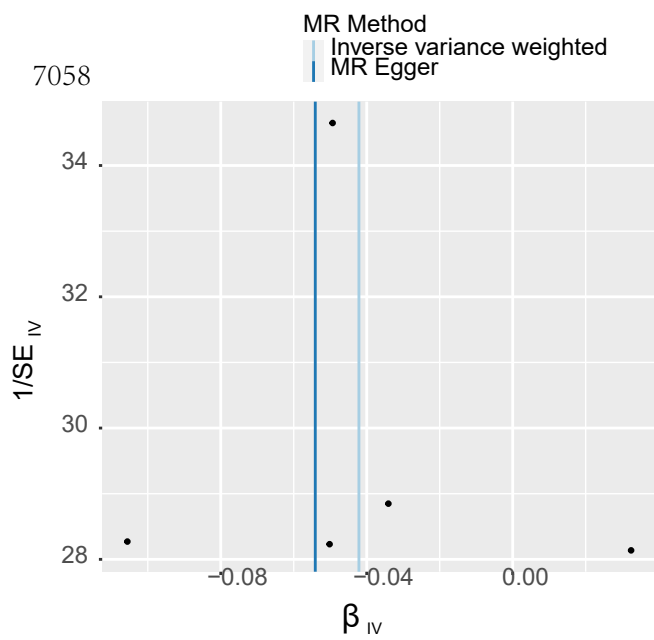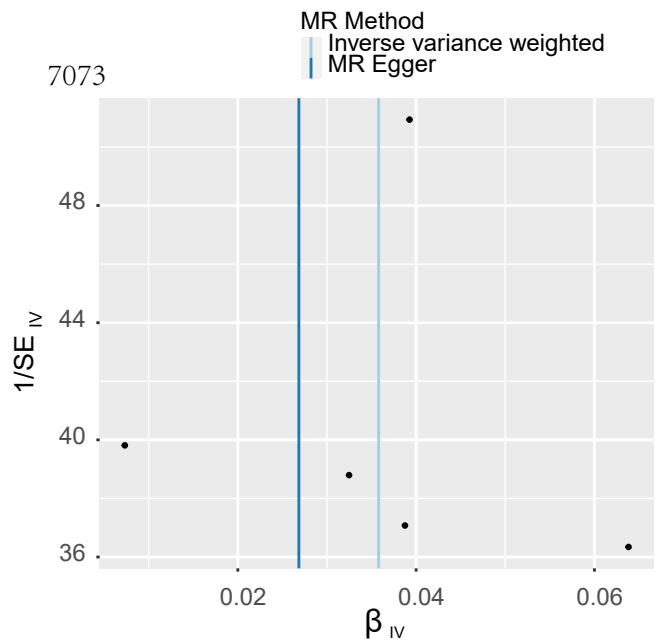

Supplement: Supplementary file 35 [file supplementary]

# Gut microbiota genera and APOA1

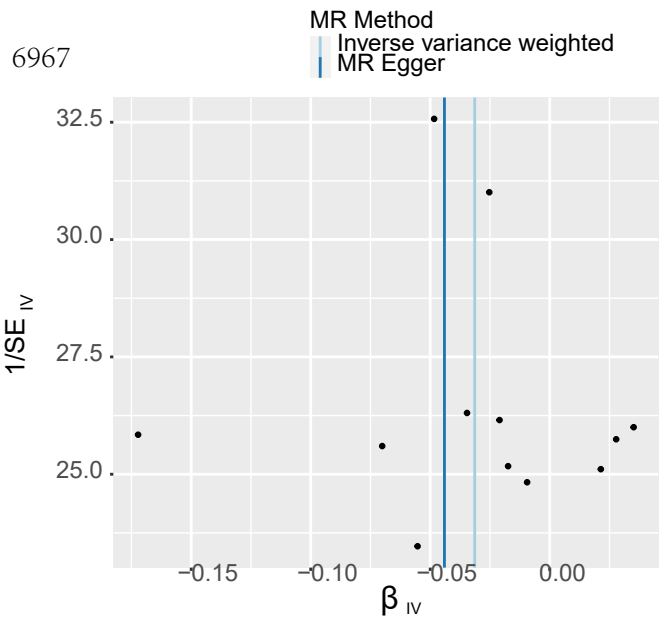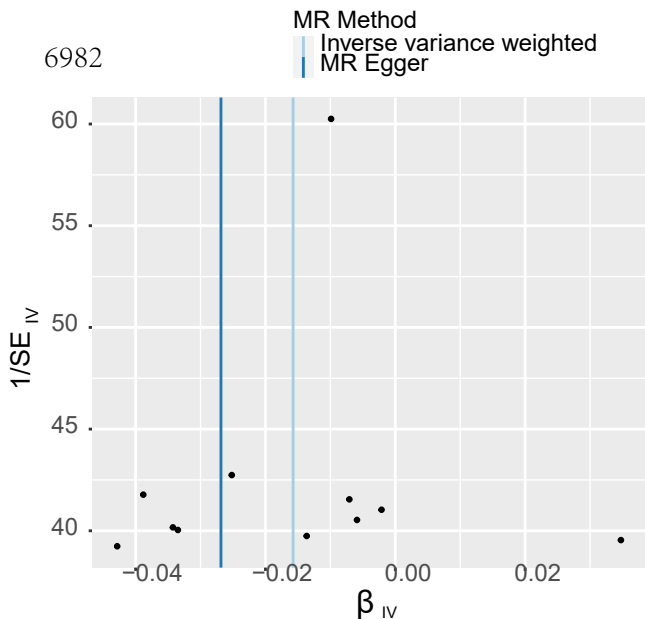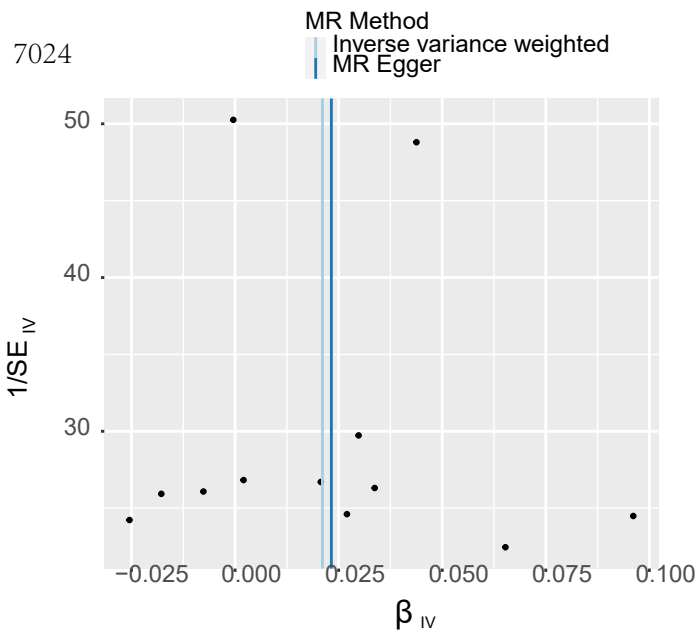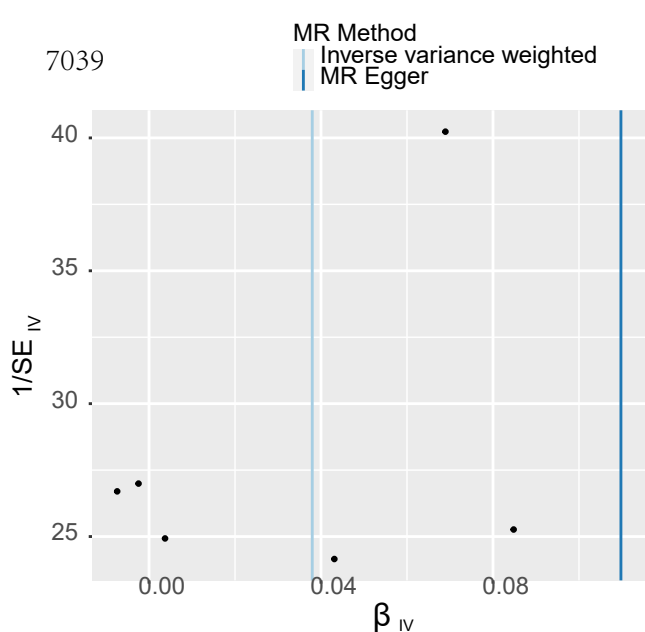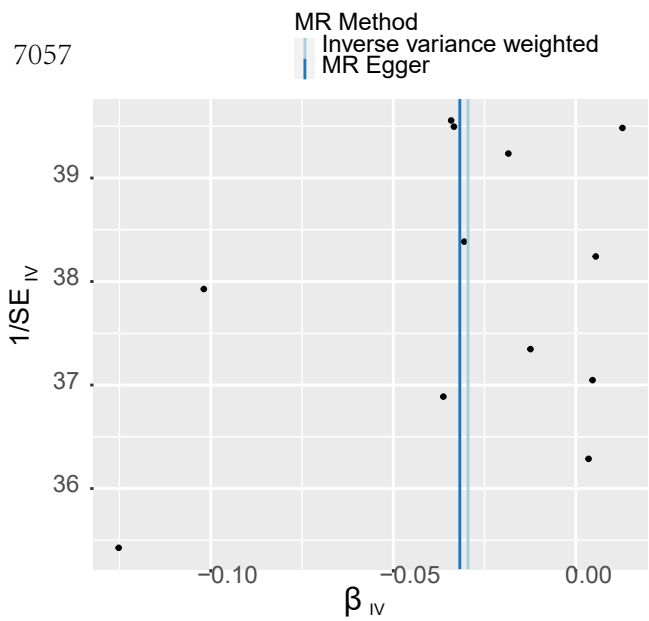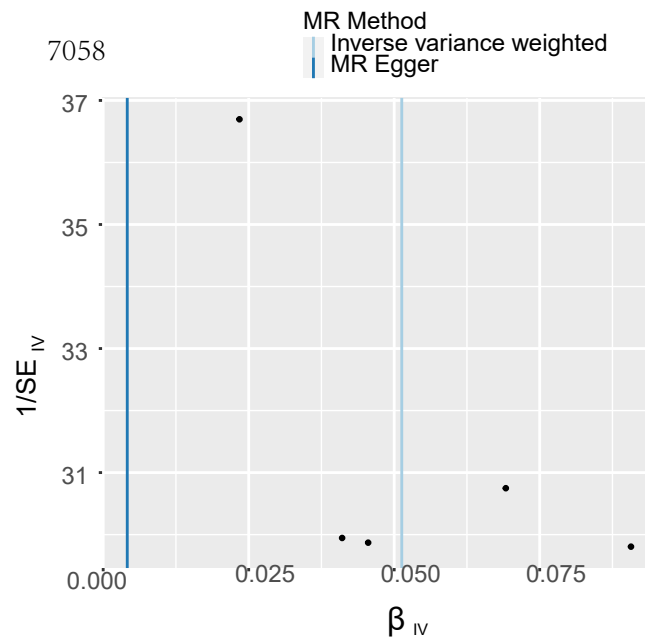

Supplement: Supplementary file 36 [file supplementary]

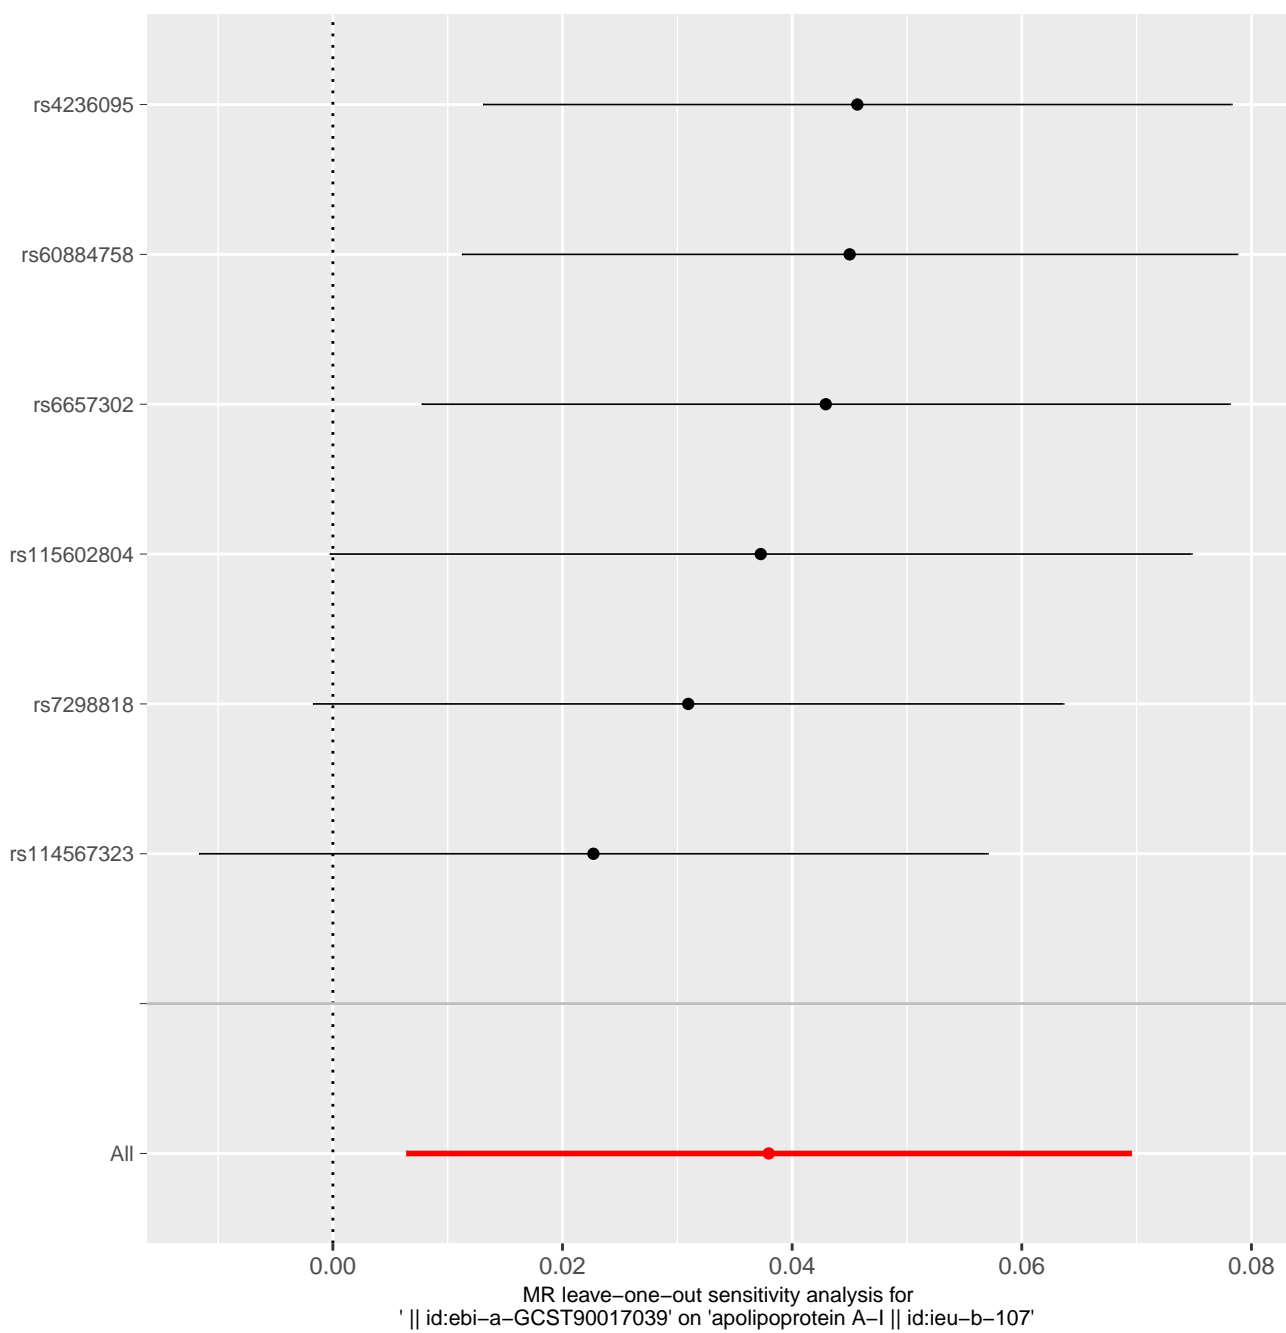

Supplement: Supplementary file 37 [file supplementary]
